# Supplementary material for: Predicting Accurate Lead Structures for Screening Molecular Libraries: A Quantum Crystallographic Approach
Source: MDPI journal article supplement (doi:10.3390/molecules26092605), 2021-04-29
Supplement: s1 [file s1]

# Predicting Accurate Lead Structure for Screening Molecular Libraries: A Quantum Crystallographic Approach

Suman Kumar Mandal and Parthapratim Munshi\*

Chemical and Biological Crystallography, Department of Chemistry, School of Natural Sciences, Shiv Nadar University, Dadri, Uttar Pradesh, INDIA 201314

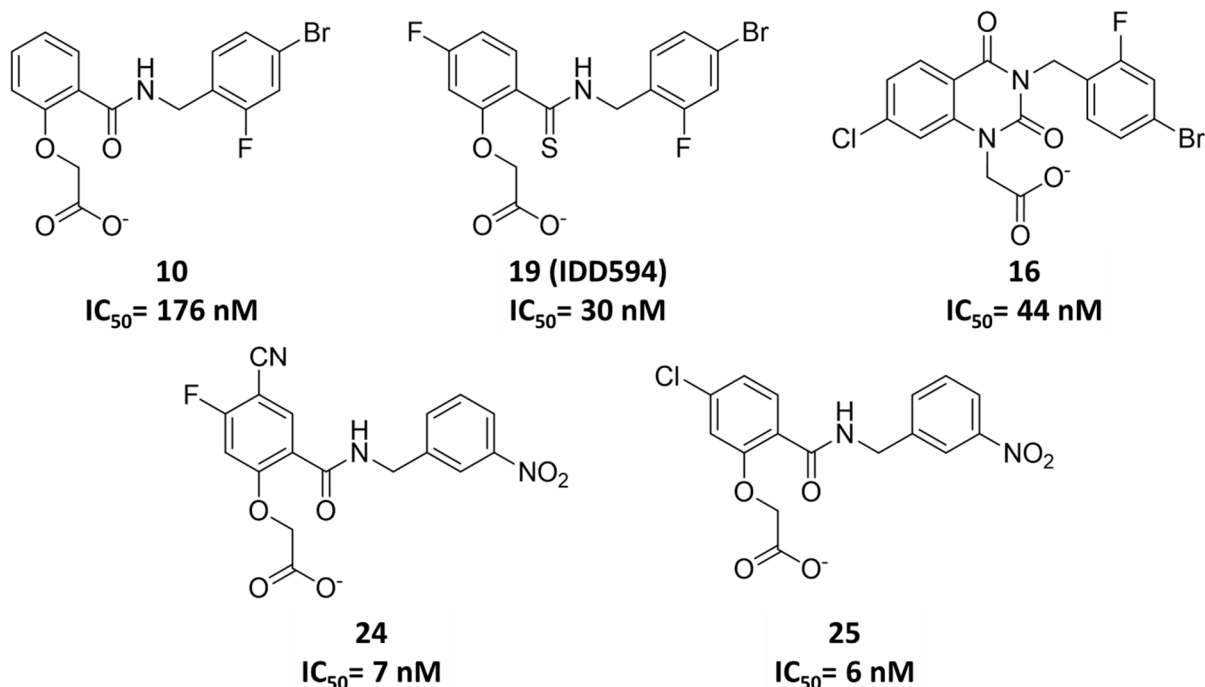

*Scheme S1* Chemical structures of the five ligands[1] docked in hAR.

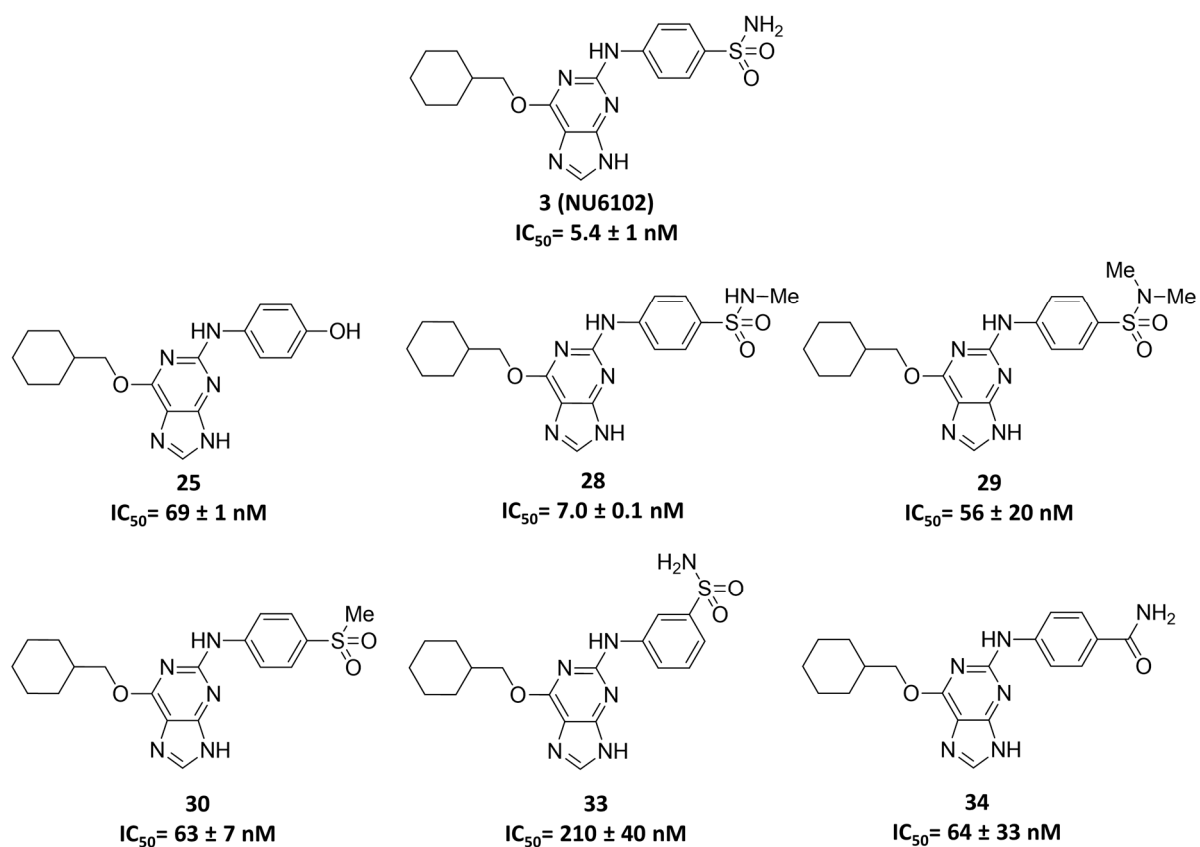

*Scheme S2* Chemical structures of the seven ligands[2] docked in CDK2.

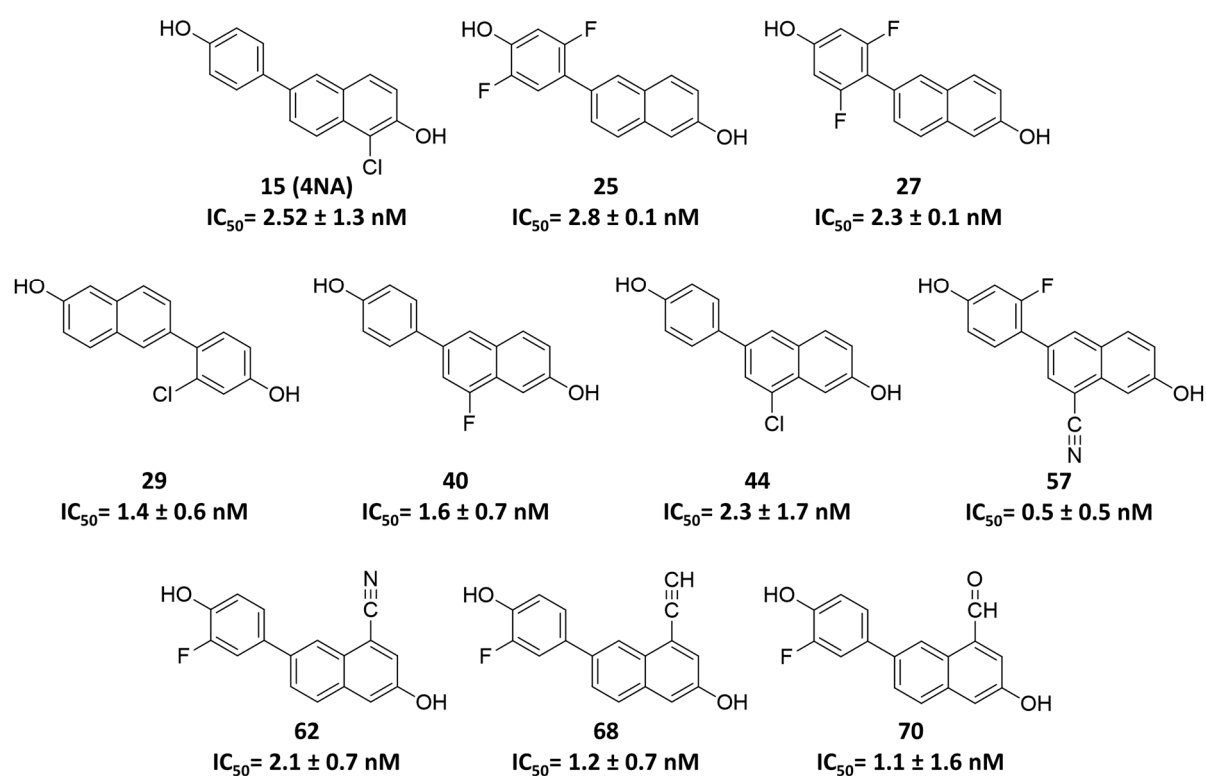

**Scheme S3** Chemical structures of the ten ligands[3] docked in ER $\beta$ .

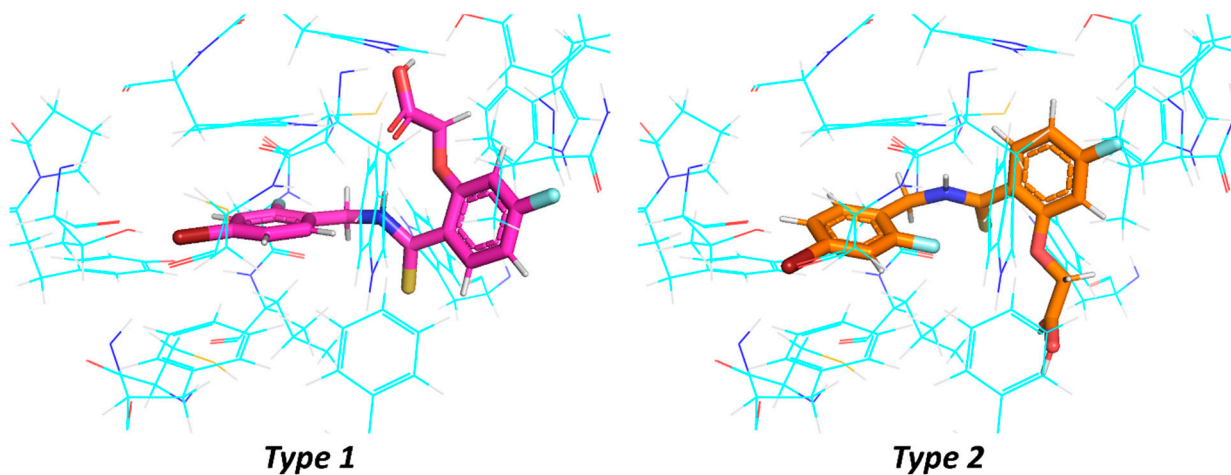

**Figure S1** Two major types of orientations of the IDD594 ligand at the binding site.

**Table S1** Population distribution of the ligands of hAR belonging to two major types.

| Population out of 30 for ligand | Type 1 | % Type 1 | Type 2 | % Type 2 | Total of all 2 Types | % all 2 Types |
|---------------------------------|--------|----------|--------|----------|----------------------|---------------|
| 10                              | 21     | 70.00    | 7      | 23.33    | 28                   | 93.33         |
| 16                              | 11     | 36.67    | 11     | 36.67    | 22                   | 73.33         |
| 19                              | 11     | 36.67    | 17     | 56.67    | 28                   | 93.33         |

|    |    |       |    |       |    |       |
|----|----|-------|----|-------|----|-------|
| 24 | 17 | 56.67 | 11 | 36.67 | 28 | 93.33 |
| 25 | 10 | 33.33 | 14 | 46.67 | 24 | 80.00 |

**Table S2** Interaction energies (kCal·mol<sup>-1</sup>) of hAR with *GoldScore* poses of ligand 10

| Residue #    | Type 1        |                |                | Type 2       |               |             |
|--------------|---------------|----------------|----------------|--------------|---------------|-------------|
|              | IE            |                |                | IE           |               |             |
|              | IE (CP)       | (Raw)          | IE (Avg)       | IE (CP)      | IE (Raw)      | IE (Avg)    |
| 20           | -0.41         | -6.28          | -3.35          | 7.82         | 2.88          | 5.35        |
| 47           | -2.16         | -3.89          | -3.03          | -0.34        | -0.51         | -0.43       |
| 48           | -20.98        | -29.25         | -25.12         | -1.98        | -4.27         | -3.13       |
| 79           | -3.54         | -4.44          | -3.99          | 4.26         | 1.27          | 2.77        |
| 80           | -0.88         | -1.04          | -0.96          | -0.84        | -1.65         | -1.25       |
| 110          | -20.32        | -25.15         | -22.74         | -2.22        | -3.00         | -2.61       |
| 111          | -22.27        | -32            | -27.14         | -6.24        | -16.48        | -11.36      |
| 113          | 4.24          | 0.26           | 2.25           | 5.22         | -0.30         | 2.46        |
| 115          | -1.65         | -2.88          | -2.27          | -2.11        | -3.13         | -2.62       |
| 122          | -2.53         | -5.3           | -3.92          | 3.53         | -0.57         | 1.48        |
| 219          | -1.69         | -4.95          | -3.32          | 12.73        | 4.16          | 8.45        |
| 298          | -0.86         | -2.12          | -1.49          | 7.57         | 4.63          | 6.10        |
| 299          | 1.23          | -1.38          | -0.08          | 4.91         | 3.13          | 4.02        |
| 300          | -2.32         | -7.38          | -4.85          | -4.35        | -12.52        | -8.44       |
| 303          | -1.63         | -4.27          | -2.95          | -3.24        | -4.02         | -3.63       |
| 309          | -1.4          | -4.55          | -2.98          | 2.04         | -3.65         | -0.81       |
| 310          | -1.42         | -2.04          | -1.73          | 8.04         | 3.92          | 5.98        |
| <b>Total</b> | <b>-78.59</b> | <b>-136.66</b> | <b>-107.67</b> | <b>34.80</b> | <b>-30.11</b> | <b>2.35</b> |

**Table S3** Interaction energies (kCal·mol<sup>-1</sup>) of hAR with *GoldScore* poses of ligand 16

| Residue # | Type 1  |          |          | Type 2  |        |          |
|-----------|---------|----------|----------|---------|--------|----------|
|           | IE      |          |          | IE      |        |          |
|           | IE (CP) | IE (Raw) | IE (Avg) | IE (CP) | (Raw)  | IE (Avg) |
| 20        | -3.16   | -7.3     | -5.23    | -2.45   | -6.83  | -4.64    |
| 47        | -1.92   | -4.71    | -3.32    | -1.07   | -1.72  | -1.40    |
| 48        | -14.21  | -22.97   | -18.59   | -0.36   | -2.05  | -1.21    |
| 79        | -5.04   | -6.82    | -5.93    | -0.83   | -1.05  | -1.40    |
| 80        | -0.82   | -0.87    | -0.85    | -0.21   | -0.37  | -0.29    |
| 110       | -20.33  | -25.75   | -23.04   | -0.20   | -0.23  | -0.22    |
| 111       | -16.84  | -27.65   | -22.25   | -2.95   | -10.99 | -6.97    |
| 113       | 1.3     | 0.12     | 0.71     | -0.05   | -2.96  | -1.51    |
| 115       | -1.52   | -1.81    | -1.67    | -0.64   | -2.43  | -1.54    |
| 122       | -1.58   | -4.99    | -3.29    | -2.35   | -3.66  | -3.01    |
| 219       | -3.47   | -5.08    | -4.28    | 5.66    | 1.02   | 3.34     |

|              |        |         |        |       |        |        |
|--------------|--------|---------|--------|-------|--------|--------|
| 298          | 3.07   | -1.27   | 0.90   | 3.44  | -0.04  | 1.70   |
| 299          | 7.62   | 2.51    | 5.07   | 4.15  | -0.54  | 1.81   |
| 300          | 2.4    | -4.97   | -1.29  | 5.30  | -2.61  | 1.35   |
| 303          | -1.64  | -2.62   | -2.13  | -0.55 | -3.47  | -2.01  |
| 309          | -1.53  | -4.04   | -2.79  | -1.48 | -3.76  | -2.62  |
| 310          | -1.5   | -2.4    | -1.95  | -0.44 | -0.63  | -0.54  |
| <b>Total</b> | -59.17 | -120.62 | -89.93 | 4.97  | -42.32 | -18.68 |

**Table S4** Interaction energies (kCal·mol<sup>-1</sup>) of hAR with *GoldScore* pose of ligand 19

| Residue<br># | Type 1        |                |                | Type 2       |              |              |
|--------------|---------------|----------------|----------------|--------------|--------------|--------------|
|              | IE (CP)       | IE (Raw)       | IE (Avg)       | IE (CP)      | IE (Raw)     | IE (Avg)     |
| 20           | -1.88         | -8.22          | -5.05          | -0.19        | -4.18        | -2.19        |
| 47           | -2.38         | -3.81          | -3.10          | -0.31        | -0.36        | -0.34        |
| 48           | -24.81        | -32.68         | -28.75         | -0.10        | -1.68        | -0.89        |
| 79           | -4.40         | -5.99          | -5.20          | -0.61        | -0.68        | -0.65        |
| 80           | -0.69         | -1.26          | -0.98          | -0.23        | -0.47        | -0.35        |
| 110          | -20.41        | -25.60         | -23.01         | -0.30        | -0.40        | -0.35        |
| 111          | -23.37        | -36.44         | -29.91         | 0.93         | -6.33        | -2.70        |
| 113          | 1.15          | -1.64          | -0.25          | 22.29        | 14.94        | 18.62        |
| 115          | -1.95         | -3.67          | -2.81          | 1.69         | -1.73        | -0.02        |
| 122          | -3.78         | -5.66          | -4.72          | -1.05        | -2.95        | -2.00        |
| 219          | -4.38         | -6.96          | -5.67          | 12.80        | 6.97         | 9.89         |
| 298          | 0.08          | -2.41          | -1.17          | 0.61         | -3.11        | -1.25        |
| 299          | 1.77          | -2.34          | -0.29          | 6.82         | 2.01         | 4.42         |
| 300          | -2.53         | -8.27          | -5.40          | 3.02         | -4.67        | -0.83        |
| 303          | -1.22         | -2.20          | -1.71          | 1.95         | -3.23        | -0.64        |
| 309          | -1.56         | -2.49          | -2.03          | -0.02        | -4.08        | -2.05        |
| 310          | -1.37         | -1.47          | -1.42          | -0.19        | -0.67        | -0.43        |
| <b>Total</b> | <b>-91.73</b> | <b>-151.11</b> | <b>-121.42</b> | <b>47.11</b> | <b>10.62</b> | <b>18.25</b> |

**Table S5** Interaction energies (kCal·mol<sup>-1</sup>) of hAR with *GoldScore* poses of ligand 24

| Residue<br># | Type 1  |          |          | Type 2  |          |          |
|--------------|---------|----------|----------|---------|----------|----------|
|              | IE (CP) | IE (Raw) | IE (Avg) | IE (CP) | IE (Raw) | IE (Avg) |
| 20           | 9.23    | -0.21    | 4.51     | -1.33   | -5.67    | -3.50    |
| 47           | -0.41   | -0.63    | -0.52    | -1.71   | -1.82    | -1.77    |
| 48           | 1.59    | -2.83    | -0.62    | -22.12  | -27.18   | -24.65   |
| 79           | -2.08   | -2.67    | -2.38    | -4.43   | -6.04    | -5.24    |
| 80           | -0.83   | -1.01    | -0.92    | 0.41    | -0.74    | -0.17    |
| 110          | -2.76   | -2.88    | -2.82    | -19.36  | -23.99   | -21.68   |
| 111          | -5.89   | -15.11   | -10.50   | -19.32  | -31.35   | -25.34   |
| 113          | 2       | -0.43    | 0.79     | 5.51    | 3.41     | 4.46     |
| 115          | -1.99   | -2.67    | -2.33    | -1.31   | -3.83    | -2.57    |
| 122          | -0.57   | -2.81    | -1.69    | -3.51   | -5.49    | -4.50    |
| 219          | -0.62   | -5.08    | -2.85    | -2.3    | -5.24    | -3.77    |
| 298          | -0.23   | -2.24    | -1.24    | -0.78   | -3.22    | -2.00    |
| 299          | 1.21    | -0.77    | 0.22     | 2.4     | -0.85    | 0.78     |
| 300          | -0.51   | -9.57    | -5.04    | -3.06   | -7.77    | -5.42    |

|              |       |        |        |        |         |        |
|--------------|-------|--------|--------|--------|---------|--------|
| 303          | -2.97 | -3.86  | -3.42  | -1.64  | -2.29   | -1.97  |
| 309          | -1.29 | -4.96  | -3.13  | 1.73   | -1.21   | 0.26   |
| 310          | -0.57 | -2.41  | -1.49  | -1.1   | -1.58   | -1.34  |
| <b>Total</b> | -6.69 | -60.14 | -33.42 | -71.92 | -124.86 | -98.39 |

**Table S6** Interaction energies (kCal·mol<sup>-1</sup>) of hAR with *GoldScore* poses of ligand 25

| Residue<br># | Type 1  |          |          | Type 2  |          |          |
|--------------|---------|----------|----------|---------|----------|----------|
|              | IE (CP) | IE (Raw) | IE (Avg) | IE (CP) | IE (Raw) | IE (Avg) |
| 20           | 6.96    | 1.95     | 4.46     | 1.04    | -4.11    | -1.54    |
| 47           | -0.03   | -0.56    | -0.30    | -2.14   | -2.46    | -2.30    |
| 48           | -1.74   | -3.38    | -2.56    | -24.5   | -30.96   | -27.73   |
| 79           | -1.67   | -1.76    | -1.72    | -4.58   | -6.04    | -5.31    |
| 80           | -0.51   | -0.53    | -0.52    | -0.96   | -1.02    | -0.99    |
| 110          | -0.96   | -1       | -0.98    | -23.22  | -28.01   | -25.62   |
| 111          | 1.58    | -6.59    | -2.51    | -15.89  | -24.96   | -20.43   |
| 113          | -0.36   | -1.25    | -0.81    | 0.11    | -1.2     | -0.55    |
| 115          | -1.32   | -1.52    | -1.42    | -1.37   | -1.63    | -1.50    |
| 122          | -0.42   | -2.08    | -1.25    | -3.42   | -4.85    | -4.14    |
| 219          | 0.47    | -4.39    | -1.96    | -4.24   | -6.58    | -5.41    |
| 298          | -1.65   | -3.71    | -2.68    | 0.33    | -1.53    | -0.60    |
| 299          | 1.08    | -1.42    | -0.17    | 0.29    | -2.22    | -0.97    |
| 300          | -4.71   | -12.78   | -8.75    | -1.58   | -5.81    | -3.70    |
| 303          | -3.63   | -4.49    | -4.06    | -1.24   | -1.88    | -1.56    |
| 309          | 3.57    | -2.39    | 0.59     | 1.52    | -4.12    | -1.30    |
| 310          | 6.89    | 2.41     | 4.65     | 5.37    | 0.96     | 3.17     |
| <b>Total</b> | 3.55    | -43.49   | -19.97   | -74.48  | -126.42  | -100.45  |

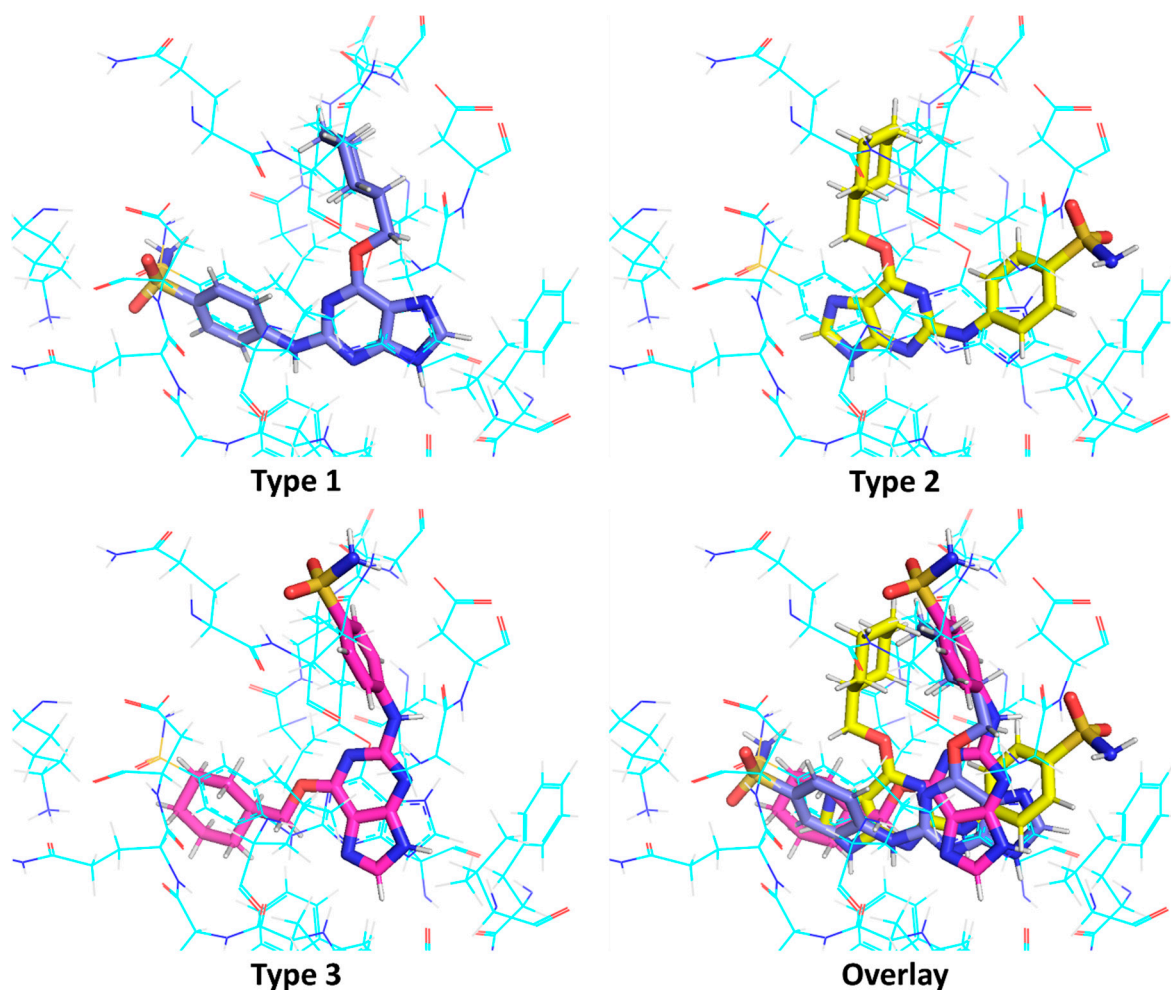

**Figure S2** Three major types of orientations of the ligand NU6102 of CDK2 at the binding site and their overlay diagrams.

**Table S7** Population distribution of various poses of the ligands of CDK2 belonging to three major types

| Population<br>out of 30 for<br>ligand | Type 1 | % of<br>Type<br>1 | Type 2 | % of<br>Type 2 | Type 3 | %<br>Type 3 | Total of all<br>3 Types | %<br>all 3 Types |
|---------------------------------------|--------|-------------------|--------|----------------|--------|-------------|-------------------------|------------------|
| 3                                     | 7      | 23.33             | 7      | 23.33          | 8      | 26.67       | 22                      | 73.33            |
| 34                                    | 8      | 26.67             | 3      | 10             | 11     | 36.67       | 22                      | 73.33            |
| 25                                    | 8      | 26.67             | 8      | 26.67          | 5      | 16.67       | 21                      | 70.00            |
| 28                                    | 13     | 43.33             | -      | -              | 8      | 26.67       | 21                      | 73.33            |
| 29                                    | 6      | 20                | 1      | 3.33           | 16     | 53.33       | 23                      | 76.67            |
| 30                                    | 15     | 50                | 3      | 10             | 7      | 23.33       | 25                      | 83.33            |
| 33                                    | 11     | 36.67             | 4      | 13.33          | 4      | 13.33       | 19                      | 63.33            |



**Table S8** Interaction energies (kCal·mol<sup>-1</sup>) of CDK2 with *GoldScore* poses of ligand 3

| Residue #    | Crystal (NU6102) |               |                | Type 1         |                |                | Type 2         |                |                | Type 3      |                |                |
|--------------|------------------|---------------|----------------|----------------|----------------|----------------|----------------|----------------|----------------|-------------|----------------|----------------|
|              | IE (CP)          | IE (Raw)      | IE (Avg)       | IE (CP)        | IE (Raw)       | IE (Avg)       | IE (CP)        | IE (Raw)       | IE (Avg)       | IE (CP)     | IE (Raw)       | IE (Avg)       |
| 10           | -1.83            | -4.99         | -3.41          | -2.51          | -4.7           | -3.61          | -1.07          | -5.67          | -3.37          | 2.81        | -0.52          | 1.15           |
| 132          | -3.44            | -4.9          | -4.17          | -2.93          | -4.28          | -3.61          | -2.76          | -3.02          | -2.89          | 15.64       | 8.55           | 12.10          |
| 134          | -0.88            | -3.46         | -2.17          | 0.97           | -1.95          | -0.49          | 0.27           | -2.13          | -0.93          | -2.61       | -5.18          | -3.90          |
| 13           | 1.81             | 0.38          | 1.095          | 3.83           | 1.61           | 2.72           | 1.01           | 0.77           | 0.89           | 1.06        | 4.66           | 2.86           |
| 144          | 1.13             | 0.97          | 1.05           | 1.15           | 0.78           | 0.97           | 1.24           | 0.25           | 0.75           | 1.55        | 1.22           | 1.39           |
| 145          | -148.85          | -150.57       | -149.71        | -147.85        | -150.76        | -149.31        | -144.33        | -147.92        | -146.13        | -127.11     | -132.99        | -130.05        |
| 146          | 0.62             | 0.62          | 0.62           | 0.66           | 0.66           | 0.66           | 1.93           | 1.61           | 1.77           | 0.72        | 0.72           | 0.72           |
| 14           | -0.02            | -0.03         | -0.025         | 0.01           | -0.02          | -0.01          | 0.02           | 0.02           | 0.02           | -0.09       | -0.37          | -0.23          |
| 18           | -1.9             | -3.16         | -2.53          | 0.74           | -0.76          | -0.01          | 0.32           | -1.1           | -0.39          | 0.42        | -1.13          | -0.36          |
| 31           | 0.06             | -0.9          | -0.42          | 1.77           | 0.13           | 0.95           | 0.36           | -0.46          | -0.05          | 0.13        | -0.52          | -0.20          |
| 33           | 30.27            | 30.27         | 30.27          | 33.75          | 33.74          | 33.75          | 22.24          | 19.3           | 20.77          | 37.08       | 37.05          | 37.07          |
| 51           | -144.8           | -144.8        | -144.8         | -145.03        | -145.03        | -145.03        | -138.71        | -141.91        | -140.31        | -127.76     | -127.76        | -127.76        |
| 55           | 0.21             | 0.21          | 0.21           | 0.26           | 0.26           | 0.26           | 0.00           | -0.19          | -0.10          | 0.21        | 0.21           | 0.21           |
| 64           | 3.08             | 2.03          | 2.555          | 0.37           | -0.26          | 0.06           | 1.66           | 0.06           | 0.86           | -0.16       | -0.65          | -0.41          |
| 80           | -2.87            | -4.18         | -3.525         | -3.45          | -5.48          | -4.47          | 5.69           | 0.15           | 2.92           | -2.71       | -2.98          | -2.85          |
| 81           | -148.19          | -150.07       | -149.13        | -148.39        | -150.29        | -149.34        | -142.96        | -143.54        | -143.25        | -89.02      | -91.26         | -90.14         |
| 82           | -4.45            | -6.72         | -5.585         | -4.06          | -7.12          | -5.59          | -3.63          | -6.41          | -5.02          | 1.74        | -1.32          | 0.21           |
| 83           | -12.79           | -17.3         | -15.045        | -9.77          | -14.56         | -12.17         | -5.4           | -9.84          | -7.62          | 3.1         | -2.24          | 0.43           |
| <b>Total</b> | <b>-432.84</b>   | <b>-456.6</b> | <b>-444.72</b> | <b>-420.48</b> | <b>-448.03</b> | <b>-434.26</b> | <b>-404.12</b> | <b>-440.03</b> | <b>-422.08</b> | <b>-285</b> | <b>-314.51</b> | <b>-299.76</b> |

**Table S9** Interaction energies (kCal·mol<sup>-1</sup>) of CDK2 with *GoldScore* poses of ligand 25

| Residue #    | Type 1         |                |                | Type 2         |                |                | Type 3         |                |                |
|--------------|----------------|----------------|----------------|----------------|----------------|----------------|----------------|----------------|----------------|
|              | IE (CP)        | IE (Raw)       | IE (Avg)       | IE (CP)        | IE (Raw)       | IE (Avg)       | IE (CP)        | IE (Raw)       | IE (Avg)       |
| 10           | -2.21          | -4.8           | -3.51          | 1.6            | -1.85          | -0.13          | 0.47           | -4.42          | -1.98          |
| 132          | -2.77          | -3.98          | -3.38          | -2.86          | -3.5           | -3.18          | -2.04          | -2.04          | -2.04          |
| 134          | -0.15          | -2.66          | -1.41          | 3.27           | -0.17          | 1.55           | -1.11          | -3.06          | -2.09          |
| 13           | 3.65           | 1.31           | 2.48           | 1.85           | 0.96           | 1.41           | 2.19           | 2.18           | 2.19           |
| 144          | 0.72           | 0.4            | 0.56           | 1.75           | 0.95           | 1.35           | 3.04           | 1.61           | 2.33           |
| 145          | -125.39        | -128.16        | -126.78        | -134.71        | -136.48        | -135.60        | -120.02        | -123.53        | -121.78        |
| 146          | 0.5            | 0.49           | 0.50           | 1.8            | 1.67           | 1.74           | 2.07           | 1.07           | 1.57           |
| 14           | -0.06          | -0.08          | -0.07          | 0.38           | 0.38           | 0.38           | 0.63           | 0.63           | 0.63           |
| 18           | 0.38           | -1.34          | -0.48          | -0.34          | -1.69          | -1.02          | -0.06          | -1.46          | -0.76          |
| 31           | 1.32           | -0.18          | 0.57           | 0              | -0.97          | -0.49          | 1.31           | 0.03           | 0.67           |
| 33           | 27.86          | 27.84          | 27.85          | 25.71          | 21.98          | 23.85          | 55.99          | 54.92          | 55.46          |
| 51           | -127.8         | -127.8         | -127.80        | -103.11        | -98.89         | -101.00        | -104.44        | -109.44        | -106.94        |
| 55           | 0.2            | 0.2            | 0.20           | 0.25           | 0.17           | 0.21           | 0.34           | -0.29          | 0.03           |
| 64           | 0.7            | 0.02           | 0.36           | 0.96           | -0.81          | 0.08           | 2.91           | 1.06           | 1.99           |
| 80           | -2.65          | -4.02          | -3.34          | -0.5           | -4.82          | -2.66          | -1.47          | -3.9           | -2.69          |
| 81           | -52.79         | -54.98         | -53.89         | -40.57         | -40.75         | -40.66         | -41.59         | -41.95         | -41.77         |
| 82           | -4.82          | -8.04          | -6.43          | -0.13          | -2.22          | -1.18          | -0.13          | -2.22          | -1.18          |
| 83           | -8.03          | -12.81         | -10.42         | -1.41          | -4.42          | -2.92          | -1.41          | -4.42          | -2.92          |
| <b>Total</b> | <b>-291.34</b> | <b>-318.59</b> | <b>-304.97</b> | <b>-246.06</b> | <b>-270.46</b> | <b>-258.26</b> | <b>-203.32</b> | <b>-235.23</b> | <b>-219.28</b> |

**Table S10** Interaction energies (kCal·mol<sup>-1</sup>) of CDK2 with *GoldScore* poses of ligand 28

| Residue #    | Type 1         |                |                | Type 3         |                |                |
|--------------|----------------|----------------|----------------|----------------|----------------|----------------|
|              | IE (CP)        | IE (Raw)       | IE (Avg)       | IE (CP)        | IE (Raw)       | IE (Avg)       |
| 10           | -3.72          | -6.63          | -5.18          | 2.5            | -1.93          | 0.29           |
| 132          | -3.11          | -4.34          | -3.73          | 0.94           | -4.03          | -1.55          |
| 134          | 1.99           | -1.2           | 0.40           | 0.26           | -1.27          | -0.51          |
| 13           | 6.6            | 3.84           | 5.22           | 3.46           | 0.53           | 2.00           |
| 144          | 1.2            | 0.9            | 1.05           | 1.16           | 1.14           | 1.15           |
| 145          | -147.48        | -150.09        | -148.79        | -123.68        | -128.78        | -126.23        |
| 146          | 0.69           | 0.69           | 0.69           | 0.13           | 0.13           | 0.13           |
| 14           | -0.01          | -0.04          | -0.03          | -0.61          | -2.55          | -1.58          |
| 18           | 0              | -1.45          | -0.73          | -0.87          | -2.95          | -1.91          |
| 31           | 0.17           | -0.93          | -0.38          | 0.16           | -0.59          | -0.22          |
| 33           | 33.85          | 33.84          | 33.85          | 41.68          | 41.68          | 41.68          |
| 51           | -144.55        | -144.55        | -144.55        | -124.51        | -124.51        | -124.51        |
| 55           | 0.27           | 0.27           | 0.27           | 0.52           | 0.52           | 0.52           |
| 64           | 0.47           | -0.25          | 0.11           | 0.72           | 0.71           | 0.72           |
| 80           | -4.34          | -5.97          | -5.16          | -0.53          | -0.55          | -0.54          |
| 81           | -148.13        | -149.59        | -148.86        | -123.85        | -124.17        | -124.01        |
| 82           | -3.59          | -6.08          | -4.84          | 0.53           | 0.15           | 0.34           |
| 83           | -10.43         | -15.64         | -13.04         | 0.11           | -0.94          | -0.42          |
| <b>Total</b> | <b>-420.12</b> | <b>-447.22</b> | <b>-433.67</b> | <b>-321.88</b> | <b>-347.41</b> | <b>-334.65</b> |

**Table S11** Interaction energies (kCal·mol<sup>-1</sup>) of CDK2 with *GoldScore* poses of ligand 29

| Residue #    | Type 1         |                |                | Type 2         |                |                | Type 3         |                |                |
|--------------|----------------|----------------|----------------|----------------|----------------|----------------|----------------|----------------|----------------|
|              | IE (CP)        | IE (Raw)       | IE (Avg)       | IE (CP)        | IE (Raw)       | IE (Avg)       | IE (CP)        | IE (Raw)       | IE (Avg)       |
| 10           | -3.22          | -6.32          | -4.77          | -3.07          | -4.97          | -4.02          | 6.69           | 3.86           | 5.28           |
| 132          | -3.04          | -4.21          | -3.63          | -3.81          | -4.85          | -4.33          | -6.45          | -7.83          | -7.14          |
| 134          | 0.72           | -2.08          | -0.68          | 2.81           | -0.26          | 1.28           | 4.06           | 1.47           | 2.77           |
| 13           | 6.08           | 3.44           | 4.76           | 1.21           | 0.79           | 1.00           | 8.87           | 5.29           | 7.08           |
| 144          | 1.21           | 0.95           | 1.08           | 1.85           | 1.08           | 1.47           | 1.03           | 0.68           | 0.86           |
| 145          | -147.87        | -150.14        | -149.01        | -144.98        | -146.39        | -145.69        | -139.81        | -145.86        | -142.84        |
| 146          | 0.68           | 0.68           | 0.68           | 0.73           | 0.69           | 0.71           | 0.69           | 0.69           | 0.69           |
| 14           | 0              | -0.03          | -0.02          | 0.11           | 0.11           | 0.11           | 0.14           | 0              | 0.07           |
| 18           | -0.05          | -1.61          | -0.83          | 1.26           | -1.76          | -0.25          | -1.08          | -2.27          | -1.68          |
| 31           | 1.39           | -0.17          | 0.61           | 0.67           | -0.83          | -0.08          | -0.62          | -1.35          | -0.99          |
| 33           | 33.71          | 33.7           | 33.71          | 27.76          | 26.96          | 27.36          | 46.19          | 45.84          | 46.02          |
| 51           | -144.74        | -144.74        | -144.74        | -141.91        | -142.33        | -142.12        | -139.09        | -139.11        | -139.10        |
| 55           | 0.27           | 0.27           | 0.27           | 0.22           | 0.19           | 0.21           | 0.49           | 0.49           | 0.49           |
| 64           | 0.2            | -0.32          | -0.06          | 1.55           | 0.06           | 0.81           | -0.15          | -0.53          | -0.34          |
| 80           | -4.25          | -6.15          | -5.20          | 15.67          | 8.33           | 12.00          | -6.48          | -8.32          | -7.40          |
| 81           | -148.13        | -149.56        | -148.85        | -118.55        | -119.05        | -118.80        | -143.23        | -143.27        | -143.25        |
| 82           | -3.34          | -6.17          | -4.76          | -1.03          | -1.49          | -1.26          | 0.5            | -1.55          | -0.53          |
| 83           | -10.26         | -15.12         | -12.69         | -3.86          | -6.69          | -5.28          | 5.43           | 1.45           | 3.44           |
| <b>Total</b> | <b>-420.64</b> | <b>-447.58</b> | <b>-434.11</b> | <b>-363.37</b> | <b>-390.41</b> | <b>-376.89</b> | <b>-362.82</b> | <b>-390.32</b> | <b>-376.57</b> |

**Table S12** Interaction energies (kCal·mol<sup>-1</sup>) of CDK2 with *GoldScore* poses of ligand

30

| Residue # | Type 1  |          |          | Type 2  |          |          | Type 3  |          |          |
|-----------|---------|----------|----------|---------|----------|----------|---------|----------|----------|
|           | IE (CP) | IE (Raw) | IE (Avg) | IE (CP) | IE (Raw) | IE (Avg) | IE (CP) | IE (Raw) | IE (Avg) |
| 10        | -0.78   | -3.78    | -2.28    | -3.48   | -7.23    | -5.36    | 0.38    | -2.65    | -1.14    |
| 132       | -2.67   | -3.14    | -2.91    | -3.41   | -4.34    | -3.88    | -5.12   | -6.85    | -5.99    |
| 134       | 0.74    | -1.83    | -0.55    | 0.02    | -2.42    | -1.20    | -0.82   | -3.46    | -2.14    |
| 13        | 7.15    | 4.5      | 5.83     | 1.62    | 0.86     | 1.24     | 0.9     | -0.82    | 0.04     |
| 144       | 1.02    | 0.67     | 0.85     | 1.25    | 1.01     | 1.13     | 1.51    | 1.31     | 1.41     |
| 145       | -145.88 | -149.5   | -147.69  | -148.95 | -149.42  | -149.19  | -123.74 | -124.27  | -124.01  |
| 146       | 0.63    | 0.63     | 0.63     | -20.58  | -21.19   | -20.89   | 0.85    | 0.85     | 0.85     |
| 14        | -0.05   | -0.12    | -0.09    | 0.12    | 0.12     | 0.12     | 0.17    | 0.15     | 0.16     |
| 18        | -1.36   | -2.44    | -1.90    | -0.6    | -2.79    | -1.70    | -0.07   | -1.78    | -0.93    |
| 31        | 2.08    | 0.48     | 1.28     | 0.79    | -0.71    | 0.04     | 0.25    | -0.35    | -0.05    |
| 33        | 30.38   | 30.37    | 30.38    | 5.27    | 4.12     | 4.70     | 38.66   | 38.65    | 38.66    |
| 51        | -144.21 | -144.21  | -144.21  | -145.74 | -146.08  | -145.91  | -119.4  | -119.4   | -119.40  |
| 55        | 0.2     | 0.2      | 0.20     | 0.21    | 0.21     | 0.21     | 0.21    | 0.21     | 0.21     |
| 64        | 0.93    | 0.24     | 0.59     | 0.18    | -1.38    | -0.60    | 0.1     | -0.27    | -0.09    |
| 80        | -3.3    | -4.38    | -3.84    | -1.1    | -3.91    | -2.51    | -15.95  | -16.17   | -16.06   |

|              |                |                |                     |                |                |                |                |                |                |
|--------------|----------------|----------------|---------------------|----------------|----------------|----------------|----------------|----------------|----------------|
| 81           | -143.03        | -145.91        | -<br>144.47         | -143.98        | -144.78        | -144.38        | -119.67        | -121.62        | -120.65        |
| 82           | 9.96           | 4.39           | 7.18                | -26.56         | -28.95         | -27.76         | -12.16         | -14.61         | -13.39         |
| 83           | 5.87           | -0.91          | 2.48                | -0.23          | -4.64          | -2.44          | 2.23           | -2.47          | -0.12          |
| <b>Total</b> | <b>-382.32</b> | <b>-414.74</b> | <b>-<br/>398.53</b> | <b>-485.17</b> | <b>-511.52</b> | <b>-498.35</b> | <b>-351.67</b> | <b>-373.55</b> | <b>-362.61</b> |

**Table S13** Interaction energies (kCal·mol<sup>-1</sup>) of CDK2 with *GoldScore* poses of ligand 33

| Residue<br># | Type 1         |                |                | Type 2         |                |                | Type 3         |                |                |
|--------------|----------------|----------------|----------------|----------------|----------------|----------------|----------------|----------------|----------------|
|              | IE<br>(CP)     | IE<br>(Raw)    | IE<br>(Avg)    | IE<br>(CP)     | IE<br>(Raw)    | IE<br>(Avg)    | IE<br>(CP)     | IE<br>(Raw)    | IE<br>(Avg)    |
| 10           | -1.78          | -5.62          | -3.70          | 0.80           | -2.77          | -0.99          | 8.38           | 5.30           | 6.84           |
| 132          | -3.23          | -4.30          | -3.77          | -3.73          | -4.11          | -3.92          | 16.01          | 11.40          | 13.71          |
| 134          | -0.30          | -2.87          | -1.59          | 0.34           | -2.13          | -0.90          | 2.90           | 0.44           | 1.67           |
| 13           | 4.58           | 2.11           | 3.35           | 0.48           | -0.36          | 0.06           | -10.93         | -15.64         | -13.29         |
| 144          | 1.24           | 0.95           | 1.10           | 1.56           | 0.96           | 1.26           | 1.13           | 0.66           | 0.90           |
| 145          | -146.86        | -149.19        | -148.03        | -113.71        | -121.79        | -117.75        | -75.45         | -82.67         | -79.06         |
| 146          | 0.68           | 0.68           | 0.68           | 1.52           | 1.35           | 1.44           | 0.65           | 0.65           | 0.65           |
| 14           | 0.11           | -0.02          | -0.01          | -0.35          | -0.59          | -0.47          | 0.33           | -0.54          | -0.11          |
| 18           | -0.10          | -1.67          | -0.89          | 5.37           | 2.50           | 3.94           | -1.03          | -2.17          | -1.60          |
| 31           | 0.93           | -0.46          | 0.24           | 1.09           | -0.34          | 0.38           | -0.55          | -1.21          | -0.88          |
| 33           | 33.57          | 33.56          | 33.57          | -0.18          | -3.64          | -1.91          | 48.71          | 48.43          | 48.57          |
| 51           | -143.80        | -143.80        | -143.80        | -135.45        | -138.14        | -136.80        | -138.56        | -138.57        | -138.57        |
| 55           | 0.26           | 0.26           | 0.26           | 0.09           | -0.01          | 0.04           | 0.51           | 0.50           | 0.51           |
| 64           | 0.62           | -0.03          | 0.30           | 1.02           | -0.04          | 0.49           | 0.02           | -0.59          | -0.29          |
| 80           | -3.96          | -5.33          | -4.65          | -0.36          | -4.18          | -2.27          | -16.24         | -17.73         | -16.99         |
| 81           | -147.69        | -149.55        | -148.62        | -140.63        | -140.78        | -140.71        | -142.74        | -142.81        | -142.78        |
| 82           | -5.02          | -8.42          | -6.72          | -4.41          | -6.83          | -5.62          | 0.86           | -1.32          | -0.23          |
| 83           | -8.35          | -12.85         | -10.60         | -8.54          | -12.14         | -10.34         | 5.73           | 1.73           | 3.73           |
| <b>Total</b> | <b>-419.21</b> | <b>-446.55</b> | <b>-432.88</b> | <b>-395.09</b> | <b>-433.04</b> | <b>-414.07</b> | <b>-300.27</b> | <b>-334.14</b> | <b>-317.21</b> |

**Table S14** Interaction energies (kCal·mol<sup>-1</sup>) of CDK2 with *GoldScore* poses of ligand 34

| Residue<br># | Type 1  |          |          | Type 2  |          |          |
|--------------|---------|----------|----------|---------|----------|----------|
|              | IE (CP) | IE (Raw) | IE (Avg) | IE (CP) | IE (Raw) | IE (Avg) |
| 10           | -1.42   | -3.62    | -2.52    | 1.29    | -2.76    | -0.74    |
| 132          | -2.19   | -3.8     | -3.00    | -3.65   | -4.94    | -4.30    |
| 134          | 0.72    | -2.16    | -0.72    | 0.91    | -1.67    | -0.38    |
| 13           | 3.23    | 1.27     | 2.25     | 2.49    | 1.51     | 2.00     |
| 144          | 1.01    | 0.68     | 0.85     | 3.24    | 1.50     | 2.37     |
| 145          | -141.69 | -144.2   | -142.95  | -123.20 | -126.75  | -124.98  |
| 146          | 0.63    | 0.63     | 0.63     | -1.32   | -2.76    | -2.04    |
| 14           | 0.02    | 0.00     | 0.01     | -0.02   | -0.03    | -0.03    |
| 18           | -0.52   | -1.81    | -1.17    | -0.97   | -2.05    | -1.51    |
| 31           | 1.59    | 0.05     | 0.82     | 2.82    | 1.01     | 1.92     |
| 33           | 31.2    | 31.19    | 31.20    | 36.69   | 35.71    | 36.20    |
| 51           | -138.56 | -138.56  | -138.56  | -104.57 | -109.47  | -107.02  |
| 55           | 0.23    | 0.23     | 0.23     | 0.15    | -0.97    | -0.41    |

|              |                |                |                |               |                |                |
|--------------|----------------|----------------|----------------|---------------|----------------|----------------|
| 64           | 0.34           | -0.21          | 0.07           | 11.35         | 7.13           | 9.24           |
| 80           | -3.95          | -5.56          | -4.76          | 0.88          | -4.84          | -1.98          |
| 81           | -142.13        | -143.76        | -142.95        | -118.88       | -119.24        | -119.06        |
| 82           | -3.88          | -6.78          | -5.33          | -5.74         | -7.60          | -6.67          |
| 83           | -9.8           | -14.41         | -12.11         | -15.37        | -18.12         | -16.75         |
| <b>Total</b> | <b>-405.17</b> | <b>-430.82</b> | <b>-418.00</b> | <b>-313.9</b> | <b>-354.34</b> | <b>-334.12</b> |

**Table S15** Comparison of ranking based on the experimental IC<sub>50</sub> values, the average IE from KEM-CP and fitting score from *GoldScore* of the best poses of the CDK2 ligands.

| Best Poses  |                        |         |                              |         |               |         |
|-------------|------------------------|---------|------------------------------|---------|---------------|---------|
| Ligand #    | Expt. IC <sub>50</sub> |         | KEM-CP                       |         | GoldScore     |         |
|             | Value                  | Ranking | IE (kCal·mol <sup>-1</sup> ) | Ranking | Fitness Score | Ranking |
| 3           | 5.4 ± 1.0              | 1       | -434.26                      | 2       | 67.87         | 3       |
| 25          | 69 ± 1                 | 6       | -304.97                      | 7       | 62.98         | 7       |
| 28          | 7.0 ± 0.1              | 2       | -433.67                      | 4       | 68.88         | 2       |
| 29          | 56 ± 20                | 3       | -434.11                      | 3       | 73.24         | 1       |
| 30          | 63 ± 7                 | 4       | -498.35                      | 1       | 66.33         | 5       |
| 33          | 210 ± 40               | 7       | -432.88                      | 5       | 66.71         | 4       |
| 34          | 64 ± 33                | 5       | -418.00                      | 6       | 64.60         | 6       |
| Correlation |                        |         |                              | 0.64    |               | 0.64    |

**Table S16** Comparison of ranking based on the experimental IC<sub>50</sub> values, the average IE from KEM-CP and fitting score from *GoldScore* of the Type 1 poses of the CDK2 ligands.

| Pose Type 1 |                       |         |                              |         |               |         |
|-------------|-----------------------|---------|------------------------------|---------|---------------|---------|
| Ligand #    | Expt IC <sub>50</sub> |         | KEM-CP                       |         | GoldScore     |         |
|             | Value                 | Ranking | IE (kCal·mol <sup>-1</sup> ) | Ranking | Fitness Score | Ranking |
| 3           | 5.4 ± 1.0             | 1       | -434.26                      | 1       | 67.87         | 3       |
| 25          | 69 ± 1                | 6       | -304.97                      | 7       | 62.98         | 7       |
| 28          | 7.0 ± 0.1             | 2       | -433.67                      | 3       | 68.88         | 2       |
| 29          | 56 ± 20               | 3       | -434.11                      | 2       | 73.24         | 1       |
| 30          | 63 ± 7                | 4       | -398.53                      | 6       | 66.33         | 5       |
| 33          | 210 ± 40              | 7       | -432.88                      | 4       | 66.71         | 4       |
| 34          | 64 ± 33               | 5       | -418.00                      | 5       | 64.60         | 6       |
| Correlation |                       |         |                              | 0.71    |               | 0.64    |

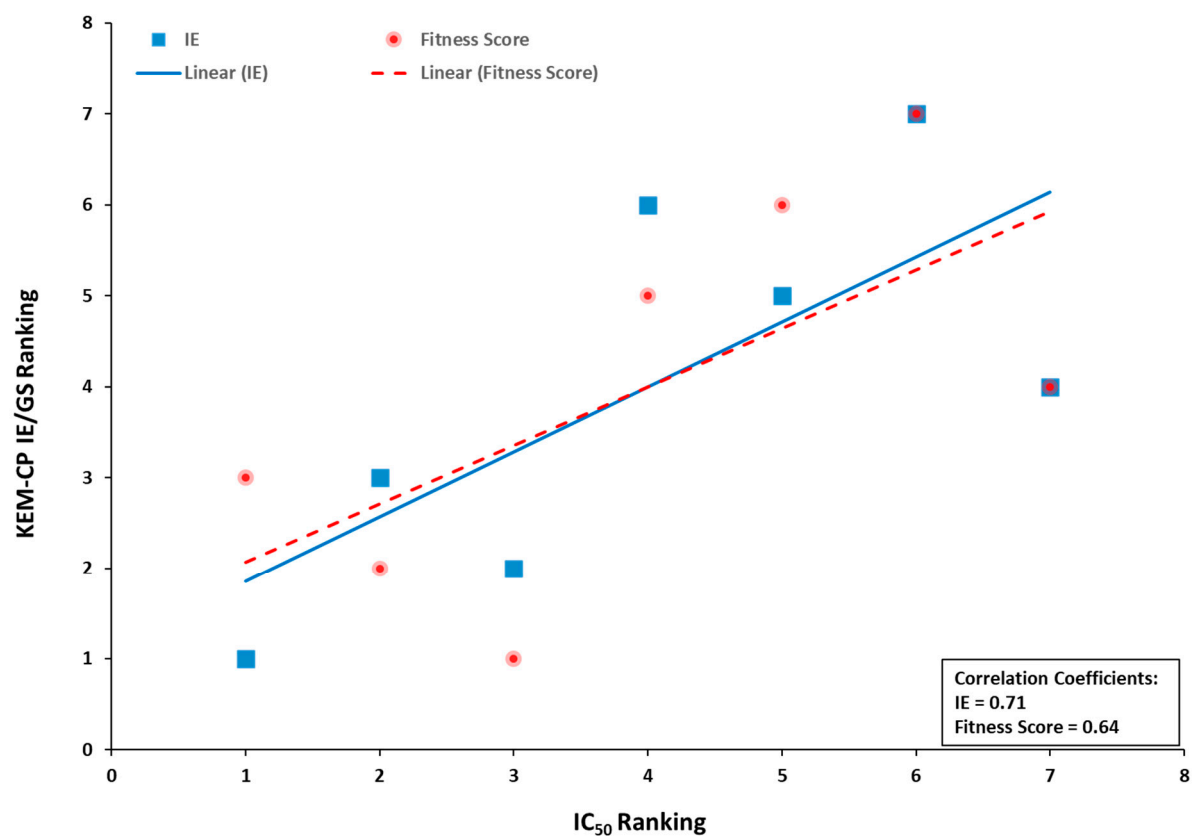

**Figure S3** Plot showing IC<sub>50</sub> ranking distribution with the KEM-CP IE and *GoldScore* Fitness score rankings for pose Type 1 (from **Table S16**)

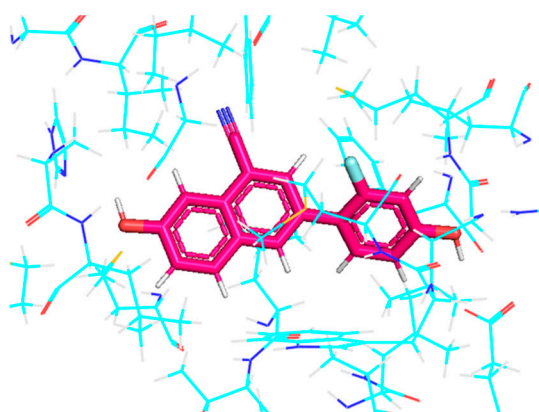

**Type 1**

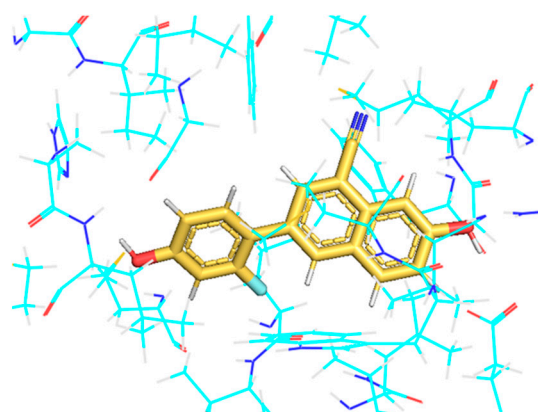

**Type 2**

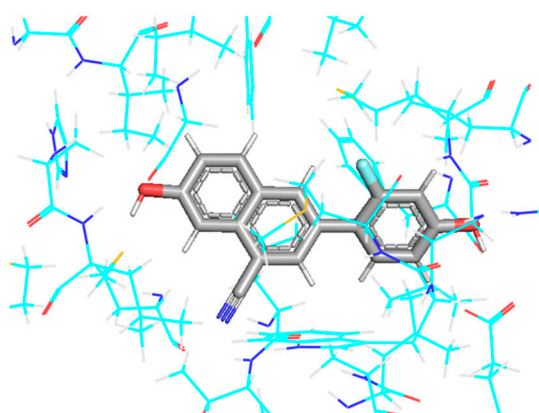

**Type 3**

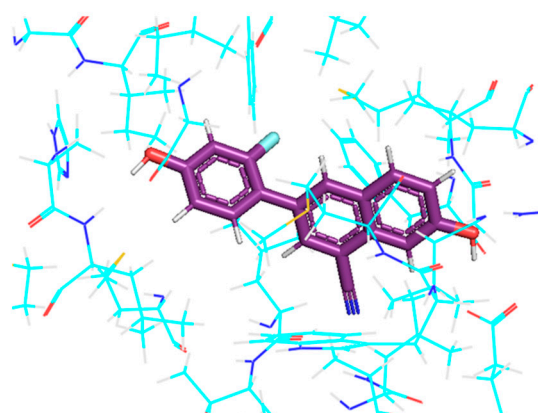

**Type 4**

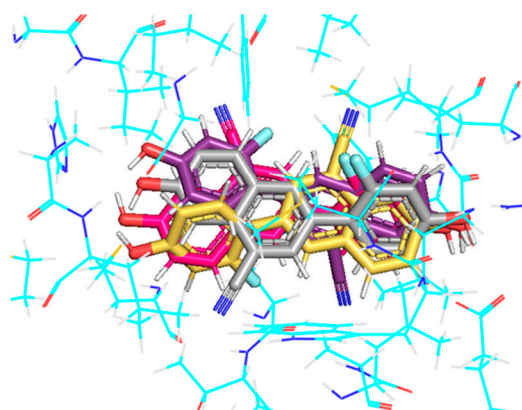

**Overlay**

**Figure S4** Four major types of orientations of the ligand 4NA of ER $\beta$  at the binding site and their overlay diagrams.



**Table S17** Population distribution of the 30 poses of the ligands of ER $\beta$  belonging to 4 types

| Population<br>out of 30 for | Type 1 | %<br>Type 1 | Type 2 | %<br>Type 2 | Type 3 | %<br>Type 3 | Type 4 | %<br>Type 4 |
|-----------------------------|--------|-------------|--------|-------------|--------|-------------|--------|-------------|
| 15                          | 10     | 33.33       | 9      | 30.00       | 5      | 16.67       | 6      | 20.00       |
| 25                          | 5      | 16.67       | 8      | 26.67       | 9      | 30.00       | 8      | 26.67       |
| 27                          | 6      | 20.00       | 7      | 23.33       | 10     | 33.33       | 7      | 23.33       |
| 29                          | 7      | 23.33       | 7      | 23.33       | 10     | 33.33       | 6      | 20.00       |
| 40                          | 10     | 33.33       | 7      | 23.33       | 7      | 23.33       | 6      | 20.00       |
| 44                          | 10     | 33.33       | 9      | 30.00       | 5      | 16.67       | 6      | 20.00       |
| 57                          | 11     | 36.67       | 7      | 23.33       | 3      | 10.00       | 9      | 30.00       |
| 62                          | 7      | 23.33       | 10     | 33.33       | 7      | 23.33       | 6      | 20.00       |
| 68                          | 11     | 36.67       | 8      | 26.67       | 4      | 13.33       | 7      | 23.33       |
| 70                          | 8      | 26.67       | 10     | 33.33       | 7      | 23.33       | 5      | 16.67       |

**Table S18** Interaction energies (kCal·mol<sup>-1</sup>) of ERβ with *GoldScore* poses of ligand 15

| Residue # | Crystal (4NA) |          |          | Type 1  |          |          | Type 2  |          |          | Type 3  |          |          | Type 4  |          |          |
|-----------|---------------|----------|----------|---------|----------|----------|---------|----------|----------|---------|----------|----------|---------|----------|----------|
|           | IE (CP)       | IE (Raw) | IE (Avg) | IE (CP) | IE (Raw) | IE (Avg) | IE (CP) | IE (Raw) | IE (Avg) | IE (CP) | IE (Raw) | IE (Avg) | IE (CP) | IE (Raw) | IE (Avg) |
| 295       | -0.1          | 1.93     | 0.92     | -1.60   | 0.19     | -0.71    | -1.77   | -0.08    | -0.93    | 1.98    | 3.27     | 2.63     | -0.15   | 1.06     | 0.46     |
| 298       | -7.65         | -4.52    | -6.09    | -3.02   | 0.65     | -1.19    | -6.13   | -2.53    | -4.33    | -4.81   | -0.96    | -2.89    | -6.28   | -2.42    | -4.35    |
| 299       | -1.24         | -0.73    | -0.99    | -0.92   | 0.40     | -0.26    | -0.78   | -0.56    | -0.67    | -1.61   | -0.72    | -1.17    | -0.59   | -0.35    | -0.47    |
| 301       | -1.51         | -0.22    | -0.87    | -1.33   | -1.03    | -1.18    | -1.29   | 0.17     | -0.56    | -1.61   | -1.20    | -1.41    | 1.33    | 3.21     | 2.27     |
| 302       | -1.52         | -0.53    | -1.03    | -1.13   | -0.23    | -0.68    | -1.61   | -0.09    | -0.85    | -1.63   | -0.39    | -1.01    | -1.16   | 1.33     | 0.09     |
| 305       | -             | -23.7    | -27.53   | -27.91  | -22.48   | -25.20   | -30.47  | -25.87   | -28.17   | -26.35  | -20.75   | -23.55   | -8.63   | -2.26    | -5.45    |
| 336       | 31.35         | -2.32    | -1.65    | -3.08   | -0.87    | -1.98    | -2.09   | -0.71    | -1.40    | -4.15   | -2.42    | -3.29    | -3.01   | -2.03    | -2.52    |
| 339       | -2.93         | 1.37     | -0.78    | 0.44    | 7.79     | 4.12     | -1.21   | 2.63     | 0.71     | 1.89    | 8.77     | 5.33     | -4.36   | -1.59    | -2.98    |
| 340       | -1.96         | -0.65    | -1.31    | -4.03   | -2.16    | -3.10    | 0.82    | 4.38     | 2.60     | -3.93   | -2.34    | -3.14    | -2.41   | -0.71    | -1.56    |
| 343       | -2.62         | -1.66    | -2.14    | -1.85   | 0.23     | -0.81    | -2.38   | -1.03    | -1.71    | -2.07   | 0.35     | -0.86    | -3.05   | -0.53    | -1.79    |
| 346       | -7.84         | -6.48    | -7.16    | -7.38   | -5.78    | -6.58    | -6.11   | -5.63    | -5.87    | -6.10   | -4.28    | -5.19    | -6.08   | -5.11    | -5.60    |
| 356       | -5.59         | -3.83    | -4.71    | -3.16   | -2.40    | -2.78    | -4.90   | -3.47    | -4.19    | -3.54   | -2.61    | -3.08    | -4.90   | -3.17    | -4.04    |
| 373       | 1.51          | 3.25     | 2.38     | -0.46   | -0.36    | -0.41    | -0.89   | 0.14     | -0.38    | -0.77   | -0.59    | -0.68    | -1.23   | -0.71    | -0.97    |
| 376       | 2.47          | 4.03     | 3.25     | -0.75   | -0.55    | -0.65    | -1.04   | -0.61    | -0.83    | -0.98   | -0.74    | -0.86    | -0.96   | -0.74    | -0.85    |
| 377       | -0.61         | -0.56    | -0.59    | -0.25   | -0.25    | -0.25    | -0.22   | -0.21    | -0.22    | -0.25   | -0.25    | -0.25    | -0.29   | -0.29    | -0.29    |
| 380       | -0.59         | -0.48    | -0.54    | -0.34   | -0.31    | -0.33    | -0.55   | -0.46    | -0.51    | -0.29   | -0.26    | -0.28    | -0.52   | -0.38    | -0.45    |
| 472       | -0.78         | -0.15    | -0.47    | 6.17    | 9.34     | 7.76     | -0.85   | -0.23    | -0.54    | 0.31    | 3.17     | 1.74     | 0.58    | 3.18     | 1.88     |
| 475       | -1.16         | 2.37     | 0.61     | -4.17   | -2.45    | -3.31    | 15.64   | 22.13    | 18.89    | -3.48   | -1.24    | -2.36    | -0.49   | 5.35     | 2.43     |
| 476       | -5.82         | -2.69    | -4.26    | -4.38   | 0.48     | -1.95    | -3.90   | 1.40     | -1.25    | -3.40   | 1.06     | -1.17    | -3.47   | 0.97     | -1.25    |
| 479       | -0.31         | -0.06    | -0.19    | -0.86   | -0.61    | -0.74    | -0.53   | 0.12     | -0.21    | -0.34   | -0.27    | -0.31    | -0.41   | -0.20    | -0.31    |
| 491       | -0.06         | -0.05    | -0.06    | -0.13   | -0.12    | -0.13    | -0.05   | -0.05    | -0.05    | -0.13   | -0.13    | -0.13    | -0.13   | -0.13    | -0.13    |
| Total     | -             | -35.01   | -53.50   | -60.14  | -20.52   | -40.33   | -50.31  | -10.56   | -30.44   | -61.26  | -22.53   | -41.90   | -46.21  | -5.52    | -25.87   |

**Table S19** Interaction energies (kCal·mol<sup>-1</sup>) of ERβ with *GoldScore* poses of ligand 25

| Residue #    | Type 1        |               |               | Type 2        |               |               | Type 3        |               |               | Type 4        |               |               |
|--------------|---------------|---------------|---------------|---------------|---------------|---------------|---------------|---------------|---------------|---------------|---------------|---------------|
|              | IE (CP)       | IE (Raw)      | IE (Avg)      | IE (CP)       | IE (Raw)      | IE (Avg)      | IE (CP)       | IE (Raw)      | IE (Avg)      | IE (CP)       | IE (Raw)      | IE (Avg)      |
| 295          | -1.98         | 0.12          | -0.93         | -2.66         | -0.64         | -1.65         | -0.39         | -0.11         | -0.25         | -4.53         | -1.72         | -3.13         |
| 298          | -7.29         | -2.86         | -5.08         | -3.44         | -0.94         | -2.19         | -3.42         | -0.66         | -2.04         | -3.61         | 2.69          | -0.46         |
| 299          | -1.49         | -0.99         | -1.24         | -0.86         | -0.78         | -0.82         | -0.89         | -0.74         | -0.82         | -2.67         | -1.04         | -1.86         |
| 301          | -2.16         | -1.03         | -1.60         | -1.59         | -1.19         | -1.39         | -2.45         | -1.14         | -1.80         | -2.59         | -1.56         | -2.08         |
| 302          | -1.99         | -0.92         | -1.46         | -1.06         | -0.29         | -0.68         | -2.24         | 0.23          | -1.01         | -2.61         | -0.41         | -1.51         |
| 305          | -31.78        | -26.68        | -29.23        | -28.67        | -22.82        | -25.75        | -33.90        | -28.14        | -31.02        | -30.46        | -24.22        | -27.34        |
| 336          | -1.39         | -1.00         | -1.20         | -2.05         | 0.52          | -0.77         | -2.68         | -1.66         | -2.17         | -1.30         | -0.99         | -1.15         |
| 339          | -1.01         | 4.31          | 1.65          | -0.43         | 6.28          | 2.93          | -2.65         | 1.57          | -0.54         | 3.62          | 10.24         | 6.93          |
| 340          | -3.60         | 0.27          | -1.67         | -2.10         | 0.31          | -0.90         | -4.40         | -1.31         | -2.86         | -0.76         | 1.75          | 0.50          |
| 343          | -4.14         | -1.44         | -2.79         | -2.53         | 0.09          | -1.22         | -3.20         | -0.09         | -1.65         | -2.70         | 0.10          | -1.30         |
| 346          | -7.49         | -6.41         | -6.95         | -8.50         | -6.63         | -7.57         | -7.92         | -6.58         | -7.25         | -9.04         | -6.95         | -8.00         |
| 356          | -4.81         | -2.59         | -3.70         | -4.44         | -3.11         | -3.78         | -4.80         | -3.29         | -4.05         | -5.99         | -3.86         | -4.93         |
| 373          | -0.65         | 0.29          | -0.18         | -1.00         | -0.60         | -0.80         | -1.07         | 0.60          | -0.24         | -0.42         | 0.65          | 0.12          |
| 376          | -0.71         | -0.47         | -0.59         | -0.82         | -0.67         | -0.75         | -1.02         | -0.11         | -0.57         | -0.17         | -0.13         | -0.15         |
| 377          | -0.44         | -0.30         | -0.37         | -0.28         | -0.27         | -0.28         | -0.42         | -0.32         | -0.37         | -0.85         | -0.43         | -0.64         |
| 380          | -0.53         | -0.39         | -0.46         | -0.90         | -0.59         | -0.75         | -0.45         | -0.37         | -0.41         | -0.35         | -0.30         | -0.33         |
| 472          | -0.31         | -0.25         | -0.28         | -6.21         | -3.07         | -4.64         | -1.67         | -1.01         | -1.34         | -0.02         | -0.02         | -0.02         |
| 475          | -6.80         | -3.92         | -5.36         | -2.56         | -0.85         | -1.71         | -0.99         | 3.69          | 1.35          | -2.11         | -1.23         | -1.67         |
| 476          | -3.59         | -0.56         | -2.08         | -3.21         | -0.14         | -1.68         | -2.65         | 0.59          | -1.03         | -1.57         | 0.76          | -0.41         |
| 479          | -1.33         | -0.85         | -1.09         | -0.19         | -0.13         | -0.16         | 0.22          | 0.28          | 0.25          | -0.72         | -0.64         | -0.68         |
| 491          | -0.11         | -0.10         | -0.11         | -0.08         | -0.08         | -0.08         | -0.19         | -0.17         | -0.18         | -0.11         | -0.11         | -0.11         |
| <b>Total</b> | <b>-83.60</b> | <b>-45.77</b> | <b>-64.69</b> | <b>-73.58</b> | <b>-35.60</b> | <b>-54.59</b> | <b>-77.18</b> | <b>-38.74</b> | <b>-57.96</b> | <b>-68.96</b> | <b>-27.42</b> | <b>-48.19</b> |

**Table S20** Interaction energies (kCal·mol<sup>-1</sup>) of ER $\beta$  with *GoldScore* poses of ligand 27

| Residue<br># | Type 1        |               |               | Type 2        |               |               | Type 3        |               |               | Type 4        |               |               |
|--------------|---------------|---------------|---------------|---------------|---------------|---------------|---------------|---------------|---------------|---------------|---------------|---------------|
|              | IE<br>(CP)    | IE<br>(Raw)   | IE<br>(Avg)   | IE<br>(CP)    | IE (Raw)      | IE<br>(Avg)   | IE<br>(CP)    | IE<br>(Raw)   | IE<br>(Avg)   | IE<br>(CP)    | IE<br>(Raw)   | IE<br>(Avg)   |
| 295          | -1.63         | -0.76         | -1.20         | -0.79         | 1.27          | 0.24          | -0.72         | -0.39         | -0.56         | -1.51         | 0.23          | -0.64         |
| 298          | -2.57         | 0.05          | -1.26         | -5.57         | -2.46         | -4.02         | -3.05         | 0.84          | -1.11         | -5.14         | 0.24          | -2.45         |
| 299          | -1.25         | -0.69         | -0.97         | -2.03         | -1.31         | -1.67         | -0.91         | -0.48         | -0.70         | -1.96         | -1.25         | -1.61         |
| 301          | -1.47         | -1.18         | -1.33         | -1.48         | -0.54         | -1.01         | -1.98         | -1.43         | -1.71         | -2.53         | -1.64         | -2.09         |
| 302          | -0.35         | 2.05          | 0.85          | -1.92         | -0.87         | -1.40         | 1.42          | 5.06          | 3.24          | -2.87         | -0.40         | -1.64         |
| 305          | -31.51        | -25.84        | -28.68        | -22.74        | -18.98        | -20.86        | -29.36        | -23.66        | -26.51        | -30.00        | -23.71        | -26.86        |
| 336          | -2.48         | -0.16         | -1.32         | -2.37         | -0.14         | -1.26         | -4.13         | -2.44         | -3.29         | -1.30         | -0.91         | -1.11         |
| 339          | -3.32         | 2.89          | -0.22         | 0.00          | 0.00          | 0.00          | 0.20          | 6.93          | 3.57          | 3.31          | 10.17         | 6.74          |
| 340          | -5.16         | -2.60         | -3.88         | -2.96         | -1.53         | -2.25         | -4.11         | -2.05         | -3.08         | -1.23         | 1.29          | 0.03          |
| 343          | 4.51          | 8.06          | 6.29          | -2.37         | -1.61         | -1.99         | -2.01         | 0.53          | -0.74         | -2.14         | 0.65          | -0.75         |
| 346          | -6.28         | -4.43         | -5.36         | -3.74         | -3.30         | -3.52         | -4.28         | -2.59         | -3.44         | -10.88        | -8.82         | -9.85         |
| 356          | -4.43         | -2.85         | -3.64         | -4.21         | -2.99         | -3.60         | -4.50         | -2.89         | -3.70         | -5.93         | -3.83         | -4.88         |
| 373          | -0.45         | -0.29         | -0.37         | -0.43         | 0.40          | -0.02         | -0.69         | -0.46         | -0.58         | -0.95         | 0.45          | -0.25         |
| 376          | -0.52         | -0.42         | -0.47         | -1.51         | -0.67         | -1.09         | -0.99         | -0.73         | -0.86         | -0.42         | -0.38         | -0.40         |
| 377          | -0.28         | -0.28         | -0.28         | -0.35         | -0.34         | -0.35         | -0.34         | -0.34         | -0.34         | -1.11         | -0.61         | -0.86         |
| 380          | -0.71         | -0.55         | -0.63         | -0.41         | -0.37         | -0.39         | -0.54         | -0.47         | -0.51         | -0.45         | -0.40         | -0.43         |
| 472          | -3.73         | -2.16         | -2.95         | -1.75         | -0.94         | -1.35         | 0.58          | 3.43          | 2.01          | -0.59         | -0.59         | -0.59         |
| 475          | -2.15         | -0.66         | -1.41         | -12.67        | -6.78         | -9.73         | -4.03         | -1.51         | -2.77         | -2.83         | -1.83         | -2.33         |
| 476          | -4.53         | -0.40         | -2.47         | -3.62         | 1.94          | -0.84         | -4.49         | -0.48         | -2.49         | -1.70         | -0.66         | -1.18         |
| 479          | -0.53         | -0.43         | -0.48         | -1.77         | -0.57         | -1.17         | -0.17         | -0.11         | -0.14         | 0.31          | 0.37          | 0.34          |
| 491          | -0.15         | -0.15         | -0.15         | -0.18         | -0.18         | -0.18         | -0.12         | -0.11         | -0.12         | -0.22         | -0.21         | -0.22         |
| <b>Total</b> | <b>-68.99</b> | <b>-30.80</b> | <b>-49.90</b> | <b>-72.87</b> | <b>-39.97</b> | <b>-56.42</b> | <b>-64.22</b> | <b>-23.35</b> | <b>-43.79</b> | <b>-70.14</b> | <b>-31.84</b> | <b>-50.99</b> |

**Table S21** Interaction energies (kCal·mol<sup>-1</sup>) of ER $\beta$  with *GoldScore* poses of ligand 29

| Residue #    | Type 1        |               |               | Type 2        |               |               | Type 3        |               |               | Type 4        |               |               |
|--------------|---------------|---------------|---------------|---------------|---------------|---------------|---------------|---------------|---------------|---------------|---------------|---------------|
|              | IE<br>(CP)    | IE<br>(Raw)   | IE<br>(Avg)   |
| 295          | -0.79         | 1.68          | 0.45          | 1.34          | 3.77          | 2.56          | -1.40         | 0.95          | -0.23         | -1.61         | -0.36         | -0.99         |
| 298          | -5.98         | -0.37         | -3.18         | -3.55         | 0.84          | -1.36         | -3.58         | -1.22         | -2.40         | -6.21         | -1.39         | -3.80         |
| 299          | -1.95         | -1.07         | -1.51         | -2.44         | -0.63         | -1.54         | -1.23         | -1.08         | -1.16         | -1.08         | -0.73         | -0.91         |
| 301          | -1.27         | 0.62          | -0.33         | -1.33         | -0.18         | -0.76         | -1.77         | -1.36         | -1.57         | -2.52         | -1.67         | -2.10         |
| 302          | -2.31         | -1.16         | -1.74         | -2.40         | -1.20         | -1.80         | -1.34         | 0.08          | -0.63         | -2.36         | 0.11          | -1.13         |
| 305          | -30.37        | -24.86        | -27.62        | -4.33         | -0.53         | -2.43         | -29.42        | -23.56        | -26.49        | -30.44        | -24.17        | -27.31        |
| 336          | -1.98         | -1.60         | -1.79         | -2.47         | 0.22          | -1.13         | -1.68         | 0.15          | -0.77         | -1.37         | -0.81         | -1.09         |
| 339          | -1.90         | 2.35          | 0.23          | -8.66         | -3.65         | -6.16         | -2.15         | 4.35          | 1.10          | 2.88          | 9.76          | 6.32          |
| 340          | -1.12         | 0.64          | -0.24         | -1.25         | 0.89          | -0.18         | 0.12          | 2.59          | 1.36          | -1.28         | 1.22          | -0.03         |
| 343          | -3.78         | -2.09         | -2.94         | -2.87         | -0.89         | -1.88         | -2.60         | -0.38         | -1.49         | -1.77         | 1.10          | -0.34         |
| 346          | -7.93         | -6.21         | -7.07         | -7.80         | -6.54         | -7.17         | -5.36         | -3.71         | -4.54         | -10.84        | -8.76         | -9.80         |
| 356          | -4.86         | -1.86         | -3.36         | -3.88         | -2.05         | -2.97         | -3.88         | -2.50         | -3.19         | -4.44         | -2.16         | -3.30         |
| 373          | -0.85         | -0.25         | -0.55         | -0.56         | -0.14         | -0.35         | 0.40          | 1.57          | 0.99          | -1.28         | -0.08         | -0.68         |
| 376          | -0.51         | -0.37         | -0.44         | -0.40         | -0.29         | -0.35         | -0.37         | -0.36         | -0.37         | -0.64         | -0.55         | -0.60         |
| 377          | -0.46         | -0.34         | -0.40         | -0.13         | -0.13         | -0.13         | -0.47         | -0.38         | -0.43         | -1.37         | -0.81         | -1.09         |
| 380          | -0.48         | -0.35         | -0.42         | -0.20         | -0.19         | -0.20         | -0.93         | -0.65         | -0.79         | -0.72         | -0.57         | -0.65         |
| 472          | -0.24         | -0.22         | -0.23         | -0.74         | -0.49         | -0.62         | -0.81         | -0.79         | -0.80         | -0.83         | -0.82         | -0.83         |
| 475          | -5.60         | -4.11         | -4.86         | -8.68         | -6.76         | -7.72         | -1.28         | -0.28         | -0.78         | -2.61         | -1.49         | -2.05         |
| 476          | -2.62         | -0.26         | -1.44         | -3.41         | -0.34         | -1.88         | -1.37         | 1.21          | -0.08         | -1.29         | 0.16          | -0.57         |
| 479          | -1.02         | -0.68         | -0.85         | -1.02         | -0.54         | -0.78         | -0.23         | 0.00          | -0.12         | 0.26          | 0.32          | 0.29          |
| 491          | -0.19         | -0.17         | -0.18         | -0.63         | -0.49         | -0.56         | -0.32         | -0.26         | -0.29         | -0.13         | -0.12         | -0.13         |
| <b>Total</b> | <b>-76.21</b> | <b>-40.68</b> | <b>-58.45</b> | <b>-55.41</b> | <b>-19.32</b> | <b>-37.37</b> | <b>-59.67</b> | <b>-25.63</b> | <b>-42.65</b> | <b>-69.65</b> | <b>-31.82</b> | <b>-50.74</b> |

**Table S22** Interaction energies (kCal·mol<sup>-1</sup>) of ERβ with *GoldScore* poses of ligand 40

| Residue<br># | Type 1        |               |               | Type 2        |               |               | Type 3        |               |               | Type 4        |               |               |
|--------------|---------------|---------------|---------------|---------------|---------------|---------------|---------------|---------------|---------------|---------------|---------------|---------------|
|              | IE<br>(CP)    | IE<br>(Raw)   | IE<br>(Avg)   | IE<br>(CP)    | IE<br>(Raw)   | IE<br>(Avg)   | IE<br>(CP)    | IE<br>(Raw)   | IE<br>(Avg)   | IE (CP)       | IE<br>(Raw)   | IE<br>(Avg)   |
| 295          | -1.83         | -0.23         | -1.03         | -1.54         | -1.01         | -1.28         | -0.42         | 0.05          | -0.19         | -1.37         | 0.55          | -0.41         |
| 298          | -3.23         | 0.43          | -1.40         | -3.16         | -1.86         | -2.51         | -2.56         | 3.99          | 0.72          | -4.78         | 0.84          | -1.97         |
| 299          | -0.85         | 0.55          | -0.15         | -0.63         | -0.52         | -0.58         | -4.26         | -1.82         | -3.04         | -0.90         | -0.52         | -0.71         |
| 301          | -1.45         | -1.11         | -1.28         | -1.61         | -1.20         | -1.41         | -1.94         | -1.44         | -1.69         | -4.44         | -1.87         | -3.16         |
| 302          | -1.15         | -0.13         | -0.64         | -0.97         | -0.06         | -0.52         | -1.13         | 0.38          | -0.38         | -2.29         | 2.03          | -0.13         |
| 305          | -28.25        | -22.51        | -25.38        | -28.40        | -22.47        | -25.44        | -27.05        | -21.06        | -24.06        | -29.24        | -22.89        | -26.07        |
| 336          | -2.73         | 0.03          | -1.35         | -3.05         | -1.67         | -2.36         | -3.98         | -2.37         | -3.18         | -1.13         | -0.80         | -0.97         |
| 339          | -0.98         | 6.14          | 2.58          | -0.58         | 5.80          | 2.61          | -1.13         | 5.10          | 1.99          | 4.90          | 12.38         | 8.64          |
| 340          | -3.75         | -2.01         | -2.88         | -3.16         | 0.61          | -1.28         | -3.51         | -2.36         | -2.94         | -1.42         | 0.94          | -0.24         |
| 343          | -1.88         | 0.06          | -0.91         | -2.81         | 0.82          | -1.00         | -2.24         | -0.42         | -1.33         | -0.59         | 2.44          | 0.93          |
| 346          | -8.06         | -6.44         | -7.25         | -8.47         | -6.61         | -7.54         | -7.51         | -5.91         | -6.71         | -10.75        | -8.79         | -9.77         |
| 356          | -3.10         | -2.36         | -2.73         | -4.24         | -2.97         | -3.61         | -3.44         | -2.47         | -2.96         | -4.87         | -3.12         | -4.00         |
| 373          | -0.20         | -0.16         | -0.18         | -0.54         | -0.34         | -0.44         | -0.68         | -0.51         | -0.60         | -0.07         | 1.64          | 0.79          |
| 376          | -0.46         | -0.41         | -0.44         | -0.69         | -0.49         | -0.59         | -0.85         | -0.65         | -0.75         | -0.48         | -0.45         | -0.47         |
| 377          | -0.22         | -0.22         | -0.22         | -0.21         | -0.21         | -0.21         | -0.24         | -0.24         | -0.24         | -0.58         | -0.44         | -0.51         |
| 380          | -0.35         | -0.32         | -0.34         | -1.59         | -0.63         | -1.11         | -0.25         | -0.23         | -0.24         | -0.42         | -0.34         | -0.38         |
| 472          | -4.12         | -2.31         | -3.22         | -3.10         | -0.73         | -1.92         | -0.30         | 2.28          | 0.99          | -0.37         | -0.37         | -0.37         |
| 475          | -3.19         | -2.31         | -2.75         | -2.04         | -0.19         | -1.12         | -3.09         | -0.82         | -1.96         | -2.48         | -1.71         | -2.10         |
| 476          | -4.08         | 0.45          | -1.82         | -3.56         | 0.70          | -1.43         | -4.53         | -0.18         | -2.36         | -1.30         | -0.75         | -1.03         |
| 479          | -0.65         | -0.41         | -0.53         | -0.29         | -0.23         | -0.26         | -0.15         | -0.08         | -0.12         | 0.23          | 0.28          | 0.26          |
| 491          | -0.17         | -0.16         | -0.17         | -0.08         | -0.08         | -0.08         | -0.16         | -0.16         | -0.16         | -0.15         | -0.14         | -0.15         |
| <b>Total</b> | <b>-70.70</b> | <b>-33.43</b> | <b>-52.07</b> | <b>-70.72</b> | <b>-33.34</b> | <b>-52.03</b> | <b>-69.42</b> | <b>-28.92</b> | <b>-49.17</b> | <b>-62.50</b> | <b>-21.09</b> | <b>-41.80</b> |

**Table S23** Interaction energies (kCal·mol<sup>-1</sup>) of ER $\beta$  with *GoldScore* poses of ligand 44

| Residue #    | Type 1        |               |               | Type 2        |               |               | Type 3        |               |               | Type 4        |              |               |
|--------------|---------------|---------------|---------------|---------------|---------------|---------------|---------------|---------------|---------------|---------------|--------------|---------------|
|              | IE (CP)       | IE (Raw)      | IE (Avg)      | IE (CP)       | IE (Raw)      | IE (Avg)      | IE (CP)       | IE (Raw)      | IE (Avg)      | IE (CP)       | IE (Raw)     | IE (Avg)      |
| 295          | -1.80         | -0.16         | -0.98         | -1.69         | -0.14         | -0.92         | -0.13         | 0.04          | -0.05         | -0.70         | -0.16        | -0.43         |
| 298          | -3.44         | 0.13          | -1.66         | -4.14         | -1.95         | -3.05         | -3.85         | -2.80         | -3.33         | 4.13          | 9.61         | 6.87          |
| 299          | -1.05         | 0.19          | -0.43         | -1.24         | -0.76         | -1.00         | -1.72         | -1.36         | -1.54         | -0.44         | -0.19        | -0.32         |
| 301          | -1.38         | -1.06         | -1.22         | -1.87         | -1.36         | -1.62         | -1.69         | -1.20         | -1.45         | 1.64          | 4.67         | 3.16          |
| 302          | -1.10         | -0.17         | -0.64         | -0.38         | 0.92          | 0.27          | -1.39         | -0.26         | -0.83         | 8.40          | 13.27        | 10.84         |
| 305          | -29.21        | -23.51        | -26.36        | -27.94        | -22.13        | -25.04        | -30.36        | -24.16        | -27.26        | -28.61        | -22.54       | -25.58        |
| 336          | -2.82         | -0.31         | -1.57         | -2.13         | -1.27         | -1.70         | -3.24         | -2.06         | -2.65         | -2.22         | -1.50        | -1.86         |
| 339          | -4.55         | 0.00          | -2.28         | -1.36         | 4.02          | 1.33          | -0.65         | 6.28          | 2.82          | -0.09         | 5.64         | 2.78          |
| 340          | -3.61         | -1.56         | -2.59         | 0.67          | 3.26          | 1.97          | -2.33         | -0.18         | -1.26         | -0.76         | 2.00         | 0.62          |
| 343          | -1.93         | 0.02          | -0.96         | 1.96          | 5.43          | 3.70          | -3.05         | -1.04         | -2.05         | -1.92         | 0.78         | -0.57         |
| 346          | -7.83         | -6.21         | -7.02         | -6.85         | -5.23         | -6.04         | -8.15         | -6.33         | -7.24         | -9.02         | -7.00        | -8.01         |
| 356          | -3.10         | -2.39         | -2.75         | -4.32         | -2.29         | -3.31         | -3.72         | -2.51         | -3.12         | -5.21         | -3.68        | -4.45         |
| 373          | -0.22         | -0.16         | -0.19         | -0.31         | -0.17         | -0.24         | -1.50         | 0.38          | -0.56         | -1.68         | -0.29        | -0.99         |
| 376          | -0.98         | -0.68         | -0.83         | -0.38         | -0.29         | -0.34         | -1.84         | -0.95         | -1.40         | -0.89         | -0.68        | -0.79         |
| 377          | -0.29         | -0.29         | -0.29         | -0.25         | -0.24         | -0.25         | -0.65         | -0.44         | -0.55         | -0.42         | -0.35        | -0.39         |
| 380          | -0.46         | -0.42         | -0.44         | 1.96          | 3.28          | 2.62          | -0.62         | -0.46         | -0.54         | -0.42         | -0.35        | -0.39         |
| 472          | 1.64          | 4.32          | 2.98          | -3.10         | -1.90         | -2.50         | -1.34         | -1.00         | -1.17         | -0.76         | -0.65        | -0.71         |
| 475          | -3.79         | -2.81         | -3.30         | -5.23         | -3.80         | -4.52         | -4.84         | -1.96         | -3.40         | -4.28         | -1.81        | -3.05         |
| 476          | -4.46         | -0.52         | -2.49         | -3.63         | 0.75          | -1.44         | -0.49         | 2.32          | 0.92          | -2.13         | -0.33        | -1.23         |
| 479          | -0.64         | -0.40         | -0.52         | -0.58         | -0.27         | -0.43         | 0.18          | 0.20          | 0.19          | 0.28          | 0.33         | 0.31          |
| 491          | -0.13         | -0.13         | -0.13         | -0.11         | -0.10         | -0.11         | -0.54         | -0.36         | -0.45         | -0.20         | -0.20        | -0.20         |
| <b>Total</b> | <b>-71.15</b> | <b>-36.12</b> | <b>-53.64</b> | <b>-60.92</b> | <b>-24.24</b> | <b>-42.58</b> | <b>-71.92</b> | <b>-37.85</b> | <b>-54.89</b> | <b>-45.30</b> | <b>-3.43</b> | <b>-24.37</b> |

**Table S24** Interaction energies (kCal·mol<sup>-1</sup>) of ERβ with *GoldScore* poses of ligand 57

| Residue<br># | Type 1        |               |               | Type 2        |               |               | Type 3        |               |               | Type 4        |             |               |
|--------------|---------------|---------------|---------------|---------------|---------------|---------------|---------------|---------------|---------------|---------------|-------------|---------------|
|              | IE<br>(CP)    | IE<br>(Raw)   | IE<br>(Avg)   | IE<br>(CP)    | IE<br>(Raw)   | IE<br>(Avg)   | IE<br>(CP)    | IE<br>(Raw)   | IE<br>(Avg)   | IE<br>(CP)    | IE<br>(Raw) | IE<br>(Avg)   |
| 295          | -1.98         | 0.32          | -0.83         | 0.21          | 2.27          | 1.24          | -0.15         | 0.07          | -0.04         | 0.03          | 0.06        | 0.05          |
| 298          | -8.90         | -5.40         | -7.15         | -1.57         | 3.52          | 0.98          | -4.29         | -3.13         | -3.71         | 12.96         | 18.80       | 15.88         |
| 299          | -1.36         | -0.88         | -1.12         | -3.86         | -1.66         | -2.76         | -3.39         | -2.25         | -2.82         | 0.38          | 0.53        | 0.46          |
| 301          | -1.42         | -0.27         | -0.85         | -2.23         | -1.66         | -1.95         | -1.59         | -1.10         | -1.35         | -0.95         | 2.32        | 0.69          |
| 302          | -0.84         | -0.20         | -0.52         | 0.33          | 2.03          | 1.18          | -1.18         | 0.01          | -0.59         | -0.15         | 3.35        | 1.60          |
| 305          | -33.83        | -28.57        | -31.20        | -29.93        | -23.64        | -26.79        | -33.22        | -27.08        | -30.15        | -28.59        | -23.12      | -25.86        |
| 336          | -0.98         | -0.66         | -0.82         | -2.18         | -1.34         | -1.76         | -3.12         | -1.96         | -2.54         | -1.60         | -1.08       | -1.34         |
| 339          | -4.05         | -1.25         | -2.65         | -1.37         | 3.80          | 1.22          | -0.16         | 6.46          | 3.15          | 0.73          | 6.10        | 3.42          |
| 340          | -2.36         | -0.27         | -1.32         | -2.96         | -0.70         | -1.83         | 0.68          | 5.12          | 2.90          | -0.33         | 2.52        | 1.10          |
| 343          | -3.07         | -1.53         | -2.30         | 4.87          | 8.67          | 6.77          | -3.13         | -1.10         | -2.12         | 0.95          | 4.20        | 2.58          |
| 346          | -5.14         | -3.88         | -4.51         | -6.90         | -5.32         | -6.11         | -4.69         | -2.81         | -3.75         | -9.48         | -7.62       | -8.55         |
| 356          | -4.60         | -1.66         | -3.13         | -4.00         | -2.02         | -3.01         | -3.93         | -2.79         | -3.36         | -6.78         | -3.88       | -5.33         |
| 373          | -0.02         | 2.08          | 1.03          | -0.08         | 0.02          | -0.03         | -1.86         | -0.13         | -1.00         | 1.36          | 3.79        | 2.58          |
| 376          | -1.32         | 0.71          | -0.31         | 0.07          | 0.12          | 0.10          | -1.65         | -0.78         | -1.22         | -1.54         | 0.69        | -0.43         |
| 377          | -3.23         | -2.03         | -2.63         | -0.06         | -0.06         | -0.06         | -0.51         | -0.36         | -0.44         | -2.20         | -0.92       | -1.56         |
| 380          | -1.50         | -1.14         | -1.32         | 3.74          | 6.06          | 4.90          | -0.71         | -0.54         | -0.63         | -1.25         | -0.65       | -0.95         |
| 472          | -0.91         | -0.87         | -0.89         | -2.98         | -2.08         | -2.53         | -1.18         | -0.84         | -1.01         | -3.08         | -2.34       | -2.71         |
| 475          | -7.08         | -4.36         | -5.72         | -5.41         | -4.28         | -4.85         | -4.60         | -1.88         | -3.24         | -5.08         | -2.09       | -3.59         |
| 476          | -3.12         | -0.57         | -1.85         | -2.91         | 1.42          | -0.75         | -0.50         | 2.69          | 1.10          | -0.28         | 0.47        | 0.10          |
| 479          | -1.30         | -0.81         | -1.06         | -0.40         | -0.03         | -0.22         | 0.13          | 0.15          | 0.14          | 0.44          | 0.44        | 0.44          |
| 491          | -0.03         | -0.02         | -0.03         | -0.19         | -0.19         | -0.19         | -1.26         | -0.72         | -0.99         | -0.23         | -0.23       | -0.23         |
| <b>Total</b> | <b>-87.04</b> | <b>-51.26</b> | <b>-69.15</b> | <b>-57.81</b> | <b>-15.07</b> | <b>-36.44</b> | <b>-70.31</b> | <b>-32.97</b> | <b>-51.64</b> | <b>-44.69</b> | <b>1.34</b> | <b>-21.68</b> |



**Table S25** Interaction energies (kCal·mol<sup>-1</sup>) of ER $\beta$  with *GoldScore* poses of ligand 62

| Residue #    | Type 1        |               |               | Type 2        |              |               | Type 3        |               |               | Type 4        |               |               |
|--------------|---------------|---------------|---------------|---------------|--------------|---------------|---------------|---------------|---------------|---------------|---------------|---------------|
|              | IE (CP)       | IE (Raw)      | IE (Avg)      | IE (CP)       | IE (Raw)     | IE (Avg)      | IE (CP)       | IE (Raw)      | IE (Avg)      | IE (CP)       | IE (Raw)      | IE (Avg)      |
| 295          | -2.09         | -0.85         | -1.47         | 0.05          | 3.51         | 1.78          | -1.12         | -0.71         | -0.92         | -0.79         | 0.36          | -0.22         |
| 298          | -5.93         | -3.14         | -4.54         | 1.79          | 7.46         | 4.63          | -4.28         | -0.37         | -2.33         | -4.07         | 1.40          | -1.34         |
| 299          | -3.34         | -1.19         | -2.27         | -1.19         | 0.63         | -0.28         | -0.82         | -0.25         | -0.54         | -0.97         | -0.61         | -0.79         |
| 301          | -1.29         | -0.54         | -0.92         | -1.25         | 1.39         | 0.07          | -1.70         | -1.20         | -1.45         | -2.17         | -0.89         | -1.53         |
| 302          | -1.79         | -0.97         | -1.38         | -3.39         | -2.22        | -2.81         | -1.06         | 0.53          | -0.27         | 0.28          | 2.77          | 1.53          |
| 305          | -26.45        | -22.19        | -24.32        | -6.62         | -4.32        | -5.47         | -30.78        | -24.66        | -27.72        | -35.22        | -29.80        | -32.51        |
| 336          | -1.88         | -1.33         | -1.61         | -2.88         | -0.35        | -1.62         | -2.72         | -0.64         | -1.68         | -2.09         | -1.46         | -1.78         |
| 339          | -2.15         | 2.19          | 0.02          | -5.36         | -0.31        | -2.84         | 0.73          | 8.39          | 4.56          | -2.85         | -1.79         | -2.32         |
| 340          | -3.22         | 0.85          | -1.19         | -0.49         | 2.77         | 1.14          | -1.00         | 3.17          | 1.09          | 0.09          | 2.29          | 1.19          |
| 343          | -4.03         | -0.69         | -2.36         | -2.54         | -0.03        | -1.29         | 3.36          | 7.96          | 5.66          | 4.47          | 8.45          | 6.46          |
| 346          | -7.47         | -6.44         | -6.96         | -5.09         | -4.19        | -4.64         | -8.55         | -6.97         | -7.76         | -6.24         | -4.53         | -5.39         |
| 356          | -4.93         | -2.58         | -3.76         | -3.66         | -1.66        | -2.66         | -3.45         | -2.59         | -3.02         | -5.95         | -1.90         | -3.93         |
| 373          | -0.72         | 0.39          | -0.17         | -0.73         | -0.19        | -0.46         | -0.41         | -0.23         | -0.32         | -1.21         | -0.54         | -0.88         |
| 376          | -1.06         | -0.60         | -0.83         | -0.66         | -0.49        | -0.58         | -1.57         | -0.95         | -1.26         | -1.14         | -0.49         | -0.82         |
| 377          | -0.31         | -0.15         | -0.23         | -0.22         | -0.22        | -0.22         | -0.21         | -0.21         | -0.21         | -0.46         | -0.46         | -0.46         |
| 380          | -0.60         | -0.39         | -0.50         | -0.25         | -0.21        | -0.23         | -0.89         | -0.81         | -0.85         | 2.26          | 4.12          | 3.19          |
| 472          | -0.74         | -0.50         | -0.62         | -0.78         | -0.38        | -0.58         | -0.60         | 3.19          | 1.30          | 6.84          | 11.30         | 9.07          |
| 475          | -2.05         | 2.75          | 0.35          | -10.65        | -8.14        | -9.40         | -3.74         | -1.70         | -2.72         | -6.64         | -1.95         | -4.30         |
| 476          | -4.32         | 0.08          | -2.12         | -2.26         | 2.50         | 0.12          | -4.37         | -0.45         | -2.41         | -5.34         | -2.24         | -3.79         |
| 479          | -0.90         | -0.56         | -0.73         | -1.36         | -0.75        | -1.06         | 0.01          | 0.07          | 0.04          | -0.30         | -0.18         | -0.24         |
| 491          | -1.50         | -0.94         | -1.22         | -0.31         | -0.31        | -0.31         | -0.03         | -0.03         | -0.03         | 0.02          | 0.03          | 0.03          |
| <b>Total</b> | <b>-76.77</b> | <b>-36.80</b> | <b>-56.79</b> | <b>-47.85</b> | <b>-5.51</b> | <b>-26.68</b> | <b>-63.20</b> | <b>-18.46</b> | <b>-40.83</b> | <b>-61.48</b> | <b>-16.12</b> | <b>-38.80</b> |

**Table S26** Interaction energies (kCal·mol<sup>-1</sup>) of ERβ with *GoldScore* poses of ligand 68

| Residue #    | Type 1        |               |               | Type 2        |              |              | Type 3        |               |               | Type 4        |             |               |
|--------------|---------------|---------------|---------------|---------------|--------------|--------------|---------------|---------------|---------------|---------------|-------------|---------------|
|              | IE (CP)       | IE (Raw)      | IE (Avg)      | IE (CP)       | IE (Raw)     | IE (Avg)     | IE (CP)       | IE (Raw)      | IE (Avg)      | IE (CP)       | IE (Raw)    | IE (Avg)      |
| 295          | -1.63         | -1.03         | -1.33         | 1.20          | 4.96         | 3.08         | -1.14         | -0.55         | -0.85         | 0.71          | 3.67        | 2.19          |
| 298          | -5.68         | -3.52         | -4.60         | 10.39         | 16.09        | 13.24        | -3.50         | 0.69          | -1.41         | -3.43         | 1.35        | -1.04         |
| 299          | -2.02         | -0.49         | -1.26         | -2.14         | -0.17        | -1.16        | -1.13         | -0.41         | -0.77         | -1.60         | -0.84       | -1.22         |
| 301          | -2.48         | 0.00          | -1.24         | 2.47          | 5.15         | 3.81         | -1.85         | -1.32         | -1.59         | -0.89         | -0.59       | -0.74         |
| 302          | -2.15         | -0.95         | -1.55         | -2.32         | -1.50        | -1.91        | -1.08         | 0.75          | -0.17         | -0.93         | 0.34        | -0.30         |
| 305          | -12.98        | -6.51         | -9.75         | -2.46         | -0.88        | -1.67        | -28.99        | -22.91        | -25.95        | -11.76        | -10.70      | -11.23        |
| 336          | -2.48         | -1.76         | -2.12         | -0.60         | 2.53         | 0.97         | -2.83         | -0.75         | -1.79         | -1.94         | -0.92       | -1.43         |
| 339          | -3.54         | 0.91          | -1.32         | 0.63          | 6.41         | 3.52         | 0.73          | 8.08          | 4.41          | -2.97         | -1.16       | -2.07         |
| 340          | -2.14         | -0.12         | -1.13         | -0.21         | 3.78         | 1.79         | -4.72         | -0.71         | -2.72         | 2.35          | 6.68        | 4.52          |
| 343          | -3.04         | -1.07         | -2.06         | -2.18         | 0.71         | -0.74        | 3.06          | 7.70          | 5.38          | -3.46         | -1.53       | -2.50         |
| 346          | -10.35        | -8.90         | -9.63         | -6.71         | -5.90        | -6.31        | -8.77         | -7.20         | -7.99         | 0.33          | 0.47        | 0.40          |
| 356          | -4.53         | -2.17         | -3.35         | -3.58         | -0.80        | -2.19        | -3.47         | -2.59         | -3.03         | -4.59         | -2.99       | -3.79         |
| 373          | -1.45         | 0.11          | -0.67         | -0.71         | -0.20        | -0.46        | -0.61         | -0.44         | -0.53         | -1.34         | 0.79        | -0.28         |
| 376          | -1.29         | -0.75         | -1.02         | -0.66         | -0.49        | -0.58        | -1.89         | -1.15         | -1.52         | -1.93         | -0.97       | -1.45         |
| 377          | -0.49         | -0.33         | -0.41         | -0.24         | -0.24        | -0.24        | -0.28         | -0.28         | -0.28         | -0.33         | -0.33       | -0.33         |
| 380          | -0.82         | -0.51         | -0.67         | -0.35         | -0.31        | -0.33        | -0.56         | -0.45         | -0.51         | -1.20         | -0.03       | -0.62         |
| 472          | -0.48         | -0.21         | -0.35         | -1.02         | -0.49        | -0.76        | 2.82          | 6.67          | 4.75          | -0.63         | -0.34       | -0.49         |
| 475          | -2.56         | 0.85          | -0.86         | -10.85        | -8.30        | -9.58        | -2.68         | -0.82         | -1.75         | -6.94         | 2.11        | -2.42         |
| 476          | -5.24         | -1.72         | -3.48         | -3.73         | 0.88         | -1.43        | -5.42         | -1.36         | -3.39         | 0.60          | 6.73        | 3.67          |
| 479          | -0.59         | -0.53         | -0.56         | -1.50         | -0.82        | -1.16        | -0.20         | -0.12         | -0.16         | -1.40         | 0.65        | -0.38         |
| 491          | -0.50         | 0.02          | -0.24         | -0.23         | -0.23        | -0.23        | -0.08         | -0.08         | -0.08         | -0.10         | -0.10       | -0.10         |
| <b>Total</b> | <b>-66.44</b> | <b>-28.68</b> | <b>-47.56</b> | <b>-24.80</b> | <b>20.18</b> | <b>-2.31</b> | <b>-62.59</b> | <b>-17.25</b> | <b>-39.92</b> | <b>-41.45</b> | <b>2.29</b> | <b>-19.58</b> |

**Table S27** Interaction energies (kCal·mol<sup>-1</sup>) of ER $\beta$  with *GoldScore* poses of ligand 70

| Residue<br># | Type 1        |               |               | Type 2        |               |               | Type 3        |               |               | Type 4        |              |               |
|--------------|---------------|---------------|---------------|---------------|---------------|---------------|---------------|---------------|---------------|---------------|--------------|---------------|
|              | IE<br>(CP)    | IE<br>(Raw)   | IE<br>(Avg)   | IE<br>(CP)    | IE<br>(Raw)   | IE<br>(Avg)   | IE<br>(CP)    | IE<br>(Raw)   | IE<br>(Avg)   | IE<br>(CP)    | IE<br>(Raw)  | IE<br>(Avg)   |
| 295          | -2.54         | -0.81         | -1.68         | 0.17          | 3.79          | 1.98          | -0.81         | -0.39         | -0.60         | -0.04         | 1.53         | 0.75          |
| 298          | -6.63         | -2.89         | -4.76         | -6.53         | 0.12          | -3.21         | -7.35         | -4.77         | -6.06         | 0.49          | 6.61         | 3.55          |
| 299          | -1.97         | 0.65          | -0.66         | -1.25         | 0.88          | -0.19         | -0.98         | -0.74         | -0.86         | -1.23         | -0.76        | -1.00         |
| 301          | -0.17         | 2.90          | 1.37          | 1.97          | 5.65          | 3.81          | -1.70         | -0.53         | -1.12         | -2.26         | -1.10        | -1.68         |
| 302          | -1.96         | -1.18         | -1.57         | -2.25         | -0.04         | -1.15         | -0.64         | 0.93          | 0.15          | 0.16          | 2.89         | 1.53          |
| 305          | -14.68        | -8.69         | -11.69        | -8.12         | -5.06         | -6.59         | -34.28        | -28.34        | -31.31        | -35.59        | -29.98       | -32.79        |
| 336          | -2.24         | -1.79         | -2.02         | -3.61         | -1.49         | -2.55         | -2.48         | -1.58         | -2.03         | -2.06         | -1.00        | -1.53         |
| 339          | -3.69         | -0.26         | -1.98         | -9.34         | -4.96         | -7.15         | -2.60         | 2.34          | -0.13         | -4.60         | -2.52        | -3.56         |
| 340          | -2.07         | -0.43         | -1.25         | -1.59         | 0.76          | -0.42         | -5.02         | -1.88         | -3.45         | 5.71          | 9.68         | 7.70          |
| 343          | -3.53         | -1.63         | -2.58         | -2.75         | -0.57         | -1.66         | -3.89         | -1.76         | -2.83         | -1.11         | 1.09         | -0.01         |
| 346          | -8.50         | -6.99         | -7.75         | -5.96         | -4.93         | -5.45         | -8.02         | -6.95         | -7.49         | -5.75         | -4.54        | -5.15         |
| 356          | -4.57         | -1.90         | -3.24         | -5.33         | -2.39         | -3.86         | -4.74         | -3.40         | -4.07         | -5.89         | -3.76        | -4.83         |
| 373          | -0.89         | 0.08          | -0.41         | -0.68         | -0.22         | -0.45         | -0.90         | 1.84          | 0.47          | -1.29         | -0.66        | -0.98         |
| 376          | -0.78         | -0.52         | -0.65         | -0.54         | -0.41         | -0.48         | -2.63         | -0.18         | -1.41         | -0.97         | -0.70        | -0.84         |
| 377          | -0.36         | -0.23         | -0.30         | -0.22         | -0.22         | -0.22         | -2.95         | -1.49         | -2.22         | -0.46         | -0.46        | -0.46         |
| 380          | -0.53         | -0.34         | -0.44         | -0.23         | -0.20         | -0.22         | -1.08         | -0.76         | -0.92         | -1.89         | -1.08        | -1.49         |
| 472          | -0.31         | -0.24         | -0.28         | -0.78         | -0.42         | -0.60         | -1.78         | -1.22         | -1.50         | 17.39         | 22.10        | 19.75         |
| 475          | -6.16         | -3.75         | -4.96         | -9.88         | -7.56         | -8.72         | 0.18          | 5.13          | 2.66          | -4.60         | 0.70         | -1.95         |
| 476          | -3.35         | 1.09          | -1.13         | -2.87         | 1.87          | -0.50         | -2.77         | 0.75          | -1.01         | -6.83         | -2.93        | -4.88         |
| 479          | -0.95         | -0.66         | -0.81         | -1.44         | -0.81         | -1.13         | 0.26          | 0.36          | 0.31          | -0.60         | -0.42        | -0.51         |
| 491          | -1.55         | -0.74         | -1.15         | -0.23         | -0.23         | -0.23         | -0.15         | -0.13         | -0.14         | 0.01          | 0.01         | 0.01          |
| <b>Total</b> | <b>-67.43</b> | <b>-28.33</b> | <b>-47.88</b> | <b>-61.46</b> | <b>-16.44</b> | <b>-38.95</b> | <b>-84.33</b> | <b>-42.77</b> | <b>-63.55</b> | <b>-51.41</b> | <b>-5.30</b> | <b>-28.36</b> |



**Table S28** Comparison of ranking based on the experimental IC<sub>50</sub> values, the average IE from KEM-CP and fitting score of the best poses of the ER $\beta$  ligands.

| Best Poses (from all Types) |                       |         |                              |         |               |         |
|-----------------------------|-----------------------|---------|------------------------------|---------|---------------|---------|
| Ligand                      | Expt IC <sub>50</sub> | KEM-CP  |                              |         | GoldScore     |         |
| #                           | Value (nM)            | Ranking | IE (kCal·mol <sup>-1</sup> ) | Ranking | Fitness Score | Ranking |
| 15                          | 2.52±1.3              | 9       | -41.90                       | 10      | 57.1          | 1*      |
| 25                          | 2.8±0.1               | 10      | -64.69                       | 2*      | 51.87         | 10      |
| 27                          | 2.3±0.1               | 7       | -56.42                       | 6       | 53.05         | 9       |
| 29                          | 1.4±0.6               | 4       | -58.45                       | 4       | 55.15         | 6       |
| 40                          | 1.6±0.7               | 5       | -52.07                       | 8       | 53.38         | 8       |
| 44                          | 2.3±1.7               | 8       | -54.89                       | 7       | 55.86         | 3*      |
| 57                          | 0.5±0.5               | 1       | -69.15                       | 1       | 55.29         | 4       |
| 62                          | 2.1±0.9               | 6       | -56.79                       | 5       | 55.28         | 5       |
| 68                          | 1.2±0.7               | 3       | -47.56                       | 9*      | 56.13         | 2       |
| 70                          | 1.1±1.6               | 2       | -63.55                       | 3       | 54.13         | 7       |
| Correlation                 |                       |         |                              | 0.88    | 0.71          |         |

\* Ligands with highest disagreements (difference of 5 to 8) in ranking were excluded for the calculation of the correlation coefficient.

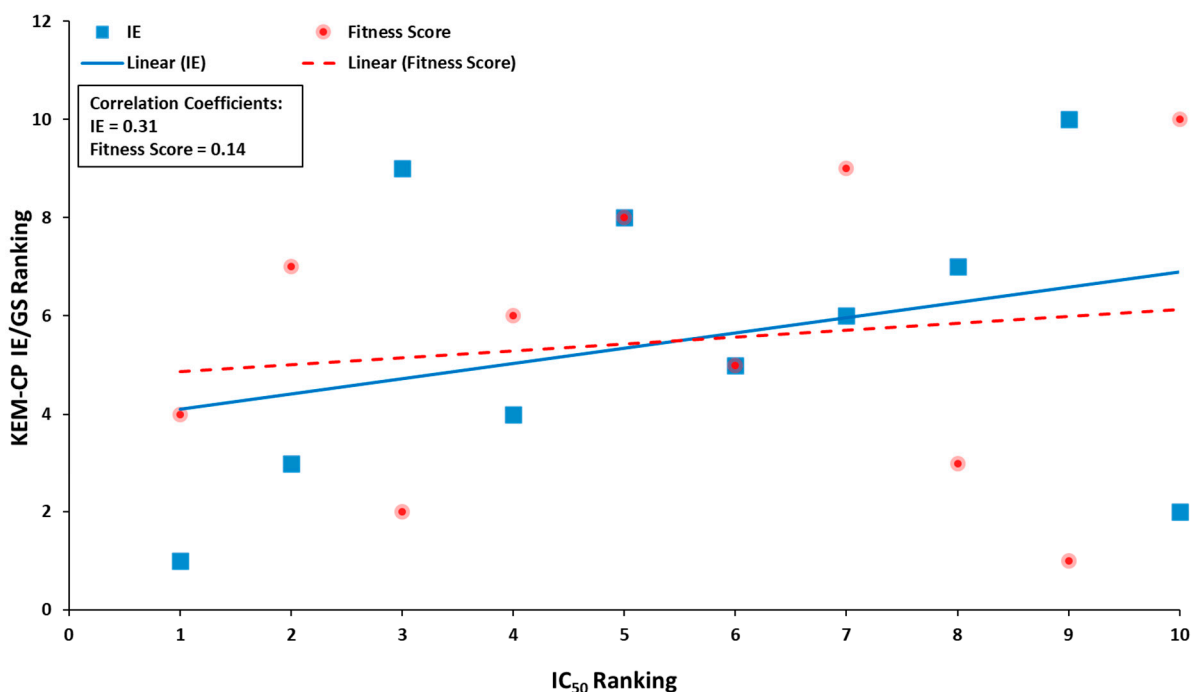

**Figure S5** Plot showing correlations of rankings based on the average KEM-CP IE and GoldScore fitness score with the ranking based on IC<sub>50</sub> values for best poses of all 10 ligands (data from **Table S28**).

**Table S29** Comparison of ranking based on the experimental IC<sub>50</sub> values, the average IE from KEM-CP and fitting score of the pose Type 1 of the ER $\beta$  ligands.

| Pose Type 1 |                       |         |                              |         |               |         |
|-------------|-----------------------|---------|------------------------------|---------|---------------|---------|
| Ligand      | Expt IC <sub>50</sub> |         | KEM-CP                       |         | GoldScore     |         |
|             | Value (nM)            | Ranking | IE (kCal·mol <sup>-1</sup> ) | Ranking | Fitness Score | Ranking |
| 15          | 2.52±1.3              | 9       | -40.33                       | 10      | 57.10         | 1*      |
| 25          | 2.8±0.1               | 10      | -64.69                       | 2*      | 50.76         | 9       |
| 27          | 2.3±0.1               | 7       | -49.90                       | 7       | 49.68         | 10      |
| 29          | 1.4±0.6               | 4       | -58.45                       | 3       | 52.28         | 8       |
| 40          | 1.6±0.7               | 5       | -52.07                       | 6       | 53.38         | 7       |
| 44          | 2.3±1.7               | 8       | -53.64                       | 5       | 55.86         | 3*      |
| 57          | 0.5±0.5               | 1       | -69.15                       | 1       | 55.29         | 4       |
| 62          | 2.1±0.9               | 6       | -56.79                       | 4       | 55.28         | 5       |
| 68          | 1.2±0.7               | 3       | -47.56                       | 9*      | 56.13         | 2       |
| 70          | 1.1±1.6               | 2       | -47.88                       | 8       | 53.93         | 6       |
| Correlation |                       |         |                              | 0.55    |               | 0.67    |

\* Ligands with highest disagreements (difference of 5 to 8) in ranking were excluded for the calculation of the correlation coefficient.

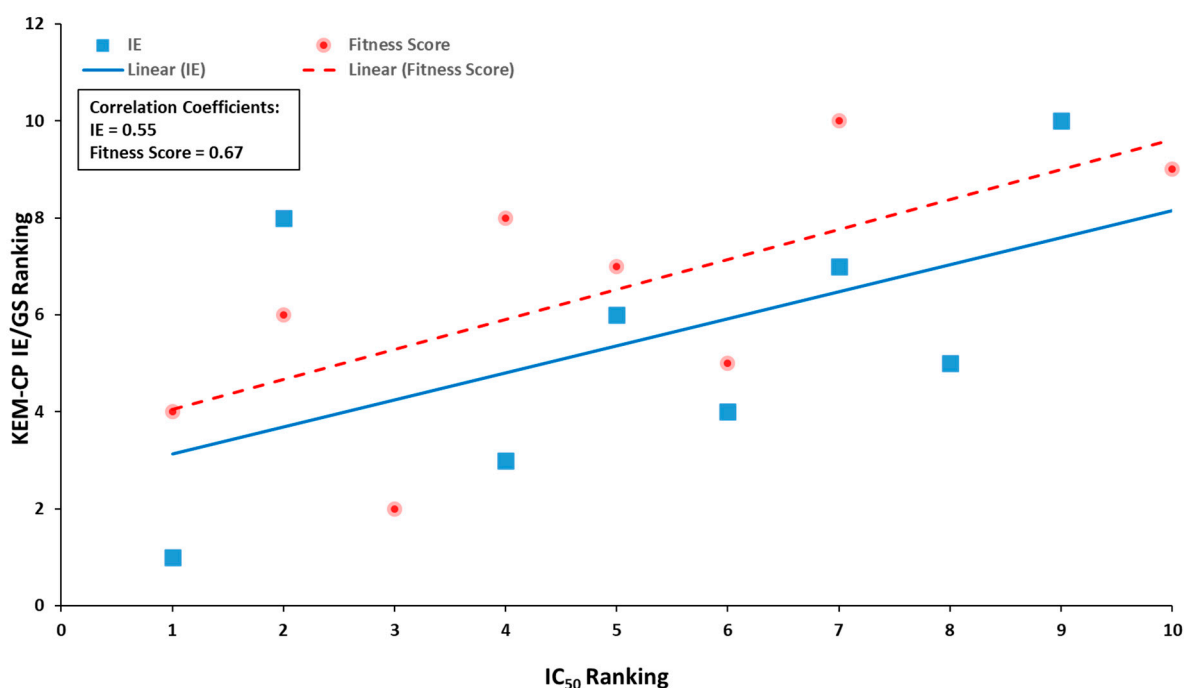

**Figure S6** Plot showing correlations of rankings based on the average KEM-CP IE and *GoldScore* fitness score with the ranking based on IC<sub>50</sub> values for pose Type 1 (data from **Table S34**)

**Table S30** Comparison of ranking based on the experimental IC<sub>50</sub> values, the average IE from KEM-CP and fitting score of the pose Type 3 of the ER $\beta$  ligands.

| Pose Type 3 |                       |         |                              |         |                  |         |
|-------------|-----------------------|---------|------------------------------|---------|------------------|---------|
| Ligand      | Expt IC <sub>50</sub> |         | KEM-CP                       |         | GoldScore        |         |
|             | Value<br>(nM)         | Ranking | IE (kCal·mol <sup>-1</sup> ) | Ranking | Fitness<br>Score | Ranking |
| 15          | 2.52±1.3              | 9       | -41.90                       | 8       | 55.11            | 3*      |
| 25          | 2.8±0.1               | 10      | -57.96                       | 2*      | 50.73            | 9       |
| 27          | 2.3±0.1               | 7       | -43.79                       | 6       | 50.02            | 10      |
| 29          | 1.4±0.6               | 4       | -42.65                       | 7       | 51.99            | 8       |
| 40          | 1.6±0.7               | 5       | -49.17                       | 5       | 52.11            | 7       |
| 44          | 2.3±1.7               | 8       | -54.89                       | 3       | 54.53            | 4       |
| 57          | 0.5±0.5               | 1       | -51.64                       | 4       | 52.72            | 6*      |
| 62          | 2.1±0.9               | 6       | -40.83                       | 9       | 55.12            | 2       |
| 68          | 1.2±0.7               | 3       | -39.92                       | 10*     | 55.18            | 1       |
| 70          | 1.1±1.6               | 2       | -63.55                       | 1       | 54.13            | 5       |
| Correlation |                       |         |                              | 0.48    |                  | 0.41    |

\* Ligands with highest disagreements (difference of 5 to 8) in ranking were excluded for the calculation of the correlation coefficient.

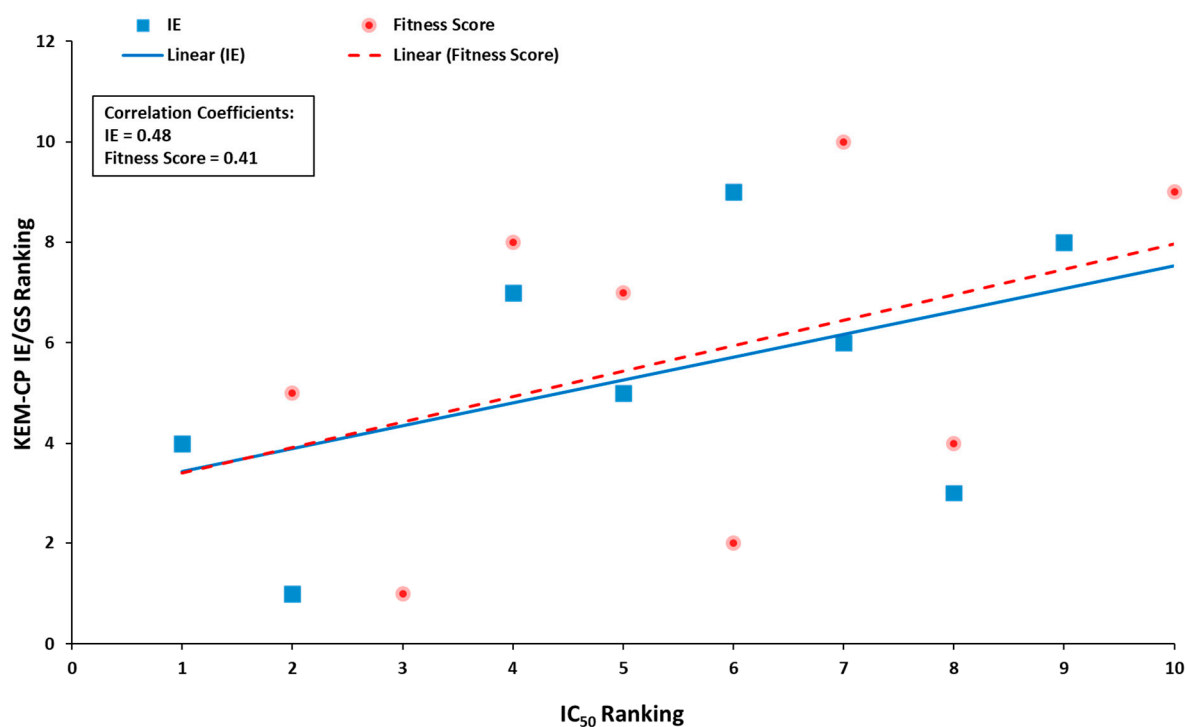

**Figure S7** Plot showing correlations of rankings based on the average KEM-CP IE and *GoldScore* fitness score with the ranking based on IC<sub>50</sub> values for pose Type 3 (data from **Table S35**)

### 1.1 Benchmarking of scoring functions

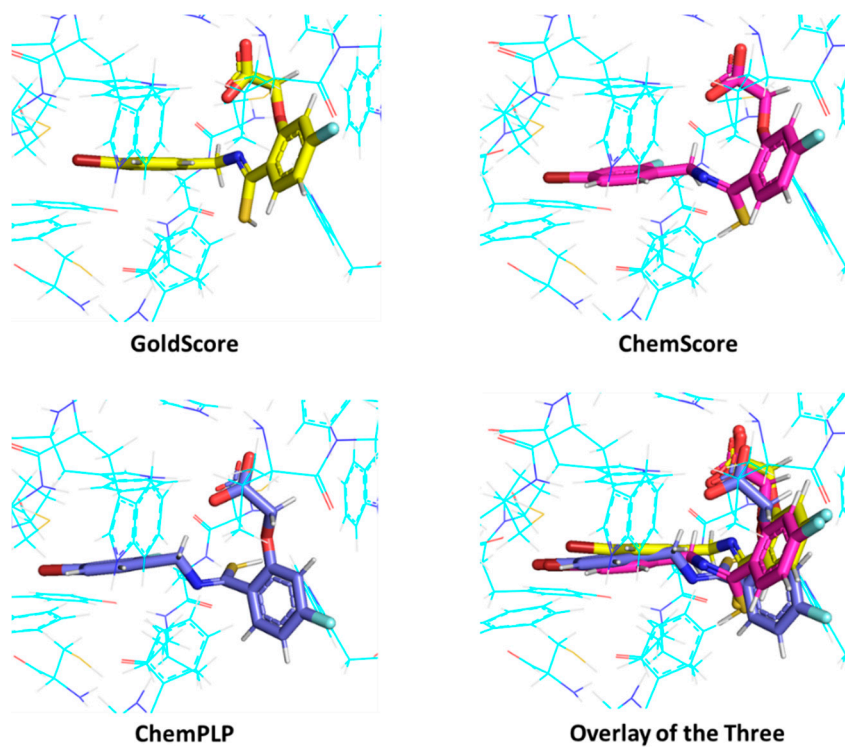

**Figure S8** Best poses of IDD594 in hAR using different scoring functions



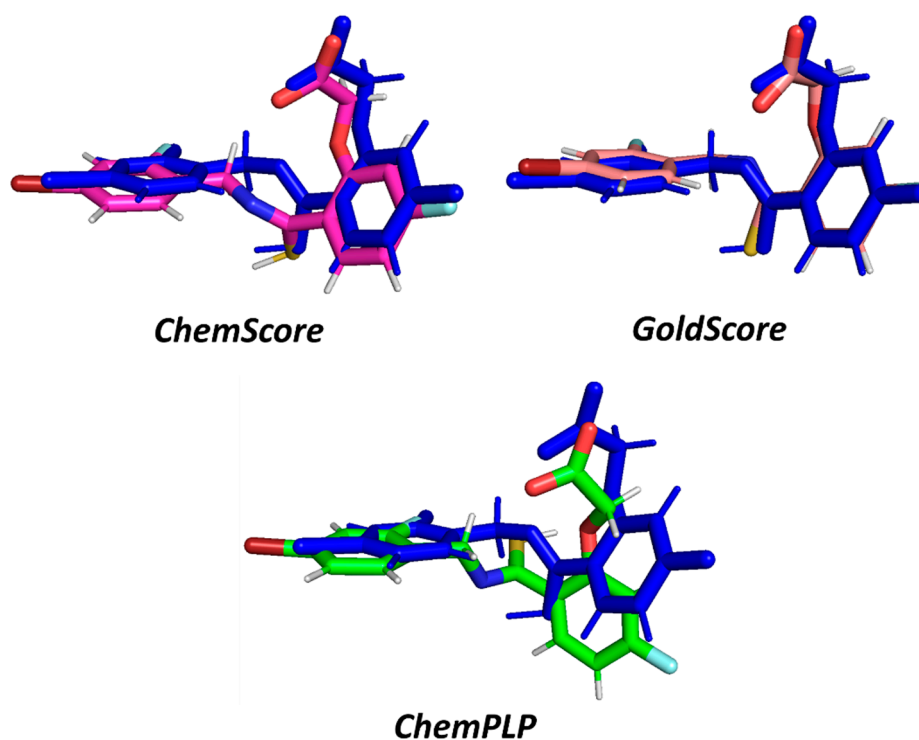

**Figure S9** Comparison of IDD594 poses generated by different scoring functions with respect to the crystal geometry (blue)

**Table S31** Interaction energies (kCal·mol<sup>-1</sup>) of hAR-IDD594 complex

| Residue # | IDD594 Crystal Geometry |        |        |
|-----------|-------------------------|--------|--------|
|           | CP corrected            | Raw    | Avg    |
| 20        | -2.29                   | -7.16  | -4.73  |
| 47        | -0.38                   | -4.13  | -2.26  |
| 48        | -5.34                   | -17.36 | -11.35 |
| 79        | -4.05                   | -5.35  | -4.70  |
| 80        | -0.85                   | -1.28  | -1.07  |
| 110       | -23.07                  | -28.29 | -25.68 |
| 111       | -26.93                  | -37.37 | -32.15 |
| 113       | 2.75                    | -0.74  | 1.01   |
| 115       | -1.68                   | -3.89  | -2.79  |
| 122       | -3.06                   | -5.81  | -4.44  |
| 219       | -2.31                   | -4.03  | -3.17  |
| 298       | -0.88                   | -2.06  | -1.47  |
| 299       | 0.45                    | -2.05  | -0.80  |
| 300       | -2.27                   | -8.06  | -5.17  |
| 303       | -1.16                   | -3.42  | -2.29  |
| 309       | -1.61                   | -3.13  | -2.37  |
| 310       | -1.33                   | -1.45  | -1.39  |

|              |               |                |                |
|--------------|---------------|----------------|----------------|
| <b>Total</b> | <b>-74.01</b> | <b>-135.58</b> | <b>-104.80</b> |
|--------------|---------------|----------------|----------------|

**Table S32** Interaction energies (kCal·mol<sup>-1</sup>) of hAR with *GoldScore* pose of ligand 19

| <i>GoldScore</i> |                     |                |                |
|------------------|---------------------|----------------|----------------|
| <b>Residue #</b> | <b>CP corrected</b> | <b>Raw</b>     | <b>Avg</b>     |
| 20               | -1.88               | -8.22          | -5.05          |
| 47               | -2.38               | -3.81          | -3.10          |
| 48               | -24.81              | -32.68         | -28.75         |
| 79               | -4.40               | -5.99          | -5.20          |
| 80               | -0.69               | -1.26          | -0.98          |
| 110              | -20.41              | -25.60         | -23.01         |
| 111              | -23.37              | -36.44         | -29.91         |
| 113              | 1.15                | -1.64          | -0.25          |
| 115              | -1.95               | -3.67          | -2.81          |
| 122              | -3.78               | -5.66          | -4.72          |
| 219              | -4.38               | -6.96          | -5.67          |
| 298              | 0.08                | -2.41          | -1.17          |
| 299              | 1.77                | -2.34          | -0.29          |
| 300              | -2.53               | -8.27          | -5.40          |
| 303              | -1.22               | -2.20          | -1.71          |
| 309              | -1.56               | -2.49          | -2.03          |
| 310              | -1.37               | -1.47          | -1.42          |
| <b>Total</b>     | <b>-91.73</b>       | <b>-151.11</b> | <b>-121.42</b> |

**Table S33** Interaction energies (kCal·mol<sup>-1</sup>) of hAR with *ChemScore* pose of ligand 19

| <i>ChemScore</i> |                     |            |            |
|------------------|---------------------|------------|------------|
| <b>Residue #</b> | <b>CP corrected</b> | <b>Raw</b> | <b>Avg</b> |
| 20               | -3.64               | -6.68      | -5.16      |
| 47               | -2.27               | -4.52      | -3.40      |
| 48               | -24.3               | -31.28     | -27.79     |
| 79               | -5.24               | -6.92      | -6.08      |
| 80               | -0.98               | -1.12      | -1.05      |
| 110              | -19.72              | -24.28     | -22.00     |
| 111              | -27.51              | -37.07     | -32.29     |
| 113              | 7.01                | 2.19       | 4.60       |
| 115              | 0.26                | -1.43      | -0.59      |
| 122              | -1.46               | -5.93      | -3.70      |
| 219              | -1.32               | -3.55      | -2.44      |
| 298              | -0.47               | -1.44      | -0.96      |
| 299              | 0.29                | -1.49      | -0.60      |
| 300              | 1.48                | -5.74      | -2.13      |

|              |               |                |                |
|--------------|---------------|----------------|----------------|
| 303          | -0.08         | -4.1           | -2.09          |
| 309          | 1.61          | -3.23          | -0.81          |
| 310          | -1.59         | -2.42          | -2.01          |
| <b>Total</b> | <b>-77.93</b> | <b>-139.01</b> | <b>-108.47</b> |

**Table S34** Interaction energies (kCal·mol<sup>-1</sup>) of hAR with *ChemPLP* pose of ligand 19

| <i>ChemPLP</i>   |                     |                |               |
|------------------|---------------------|----------------|---------------|
| <b>Residue #</b> | <b>CP corrected</b> | <b>Raw</b>     | <b>Avg</b>    |
| 20               | -1.92               | -3.72          | -2.82         |
| 47               | -1.94               | -2.24          | -2.09         |
| 48               | -19.53              | -23.98         | -21.76        |
| 79               | -5.11               | -8.06          | -6.59         |
| 80               | -1.2                | -1.56          | -1.38         |
| 110              | -16.8               | -20.29         | -18.55        |
| 111              | -26.49              | -35.27         | -30.88        |
| 113              | 17.62               | 10.35          | 13.99         |
| 115              | 4.22                | 1.65           | 2.94          |
| 122              | -4.36               | -6.78          | -5.57         |
| 219              | 8.01                | 3.11           | 5.56          |
| 298              | -1.71               | -2.62          | -2.17         |
| 299              | 1.5                 | -0.01          | 0.75          |
| 300              | -2.13               | -8.67          | -5.40         |
| 303              | -0.97               | -4.75          | -2.86         |
| 309              | 7.52                | 1.15           | 4.34          |
| 310              | -1.47               | -2.99          | -2.23         |
| <b>Total</b>     | <b>-44.76</b>       | <b>-104.68</b> | <b>-74.72</b> |

**Table S35** Interaction energy (IE) of hAR with IDD594 poses generated by different scoring function and with the crystal geometry of IDD594 and RMSD of the docked poses with respect to the crystal geometry.

| <b>Source of Pose</b>   | <b>IE (CP Corrected)<br/>(kCal·mol<sup>-1</sup>)</b> | <b>IE (Raw)<br/>(kCal·mol<sup>-1</sup>)</b> | <b>Average IE<br/>(kCal·mol<sup>-1</sup>)</b> | <b>RMSD<br/>(Å)</b> |
|-------------------------|------------------------------------------------------|---------------------------------------------|-----------------------------------------------|---------------------|
| <b>Crystal geometry</b> | -74.01                                               | -135.58                                     | -104.80                                       | 0.000               |
| <i>GoldScore</i>        | -91.73                                               | -151.11                                     | -121.42                                       | 0.137               |
| <i>ChemScore</i>        | -77.93                                               | -139.01                                     | -108.47                                       | 0.506               |
| <i>ChemPLP</i>          | -44.76                                               | -104.68                                     | -74.72                                        | 0.984               |

The pairwise IE for the crystal geometry IDD594 and the docked poses are listed in **Table S1-S4**. For *ChemPLP*, the best pose (rank 1) provided the higher average IE (~ -

75 kCal·mol<sup>-1</sup>) with RMSD of ~1 Å (highest). For *ChemScore*, the best pose with reasonable RMSD (~0.5 Å) give rise to an average IE (~ -108 kCal·mol<sup>-1</sup>) comparable to that of the crystal geometry. However, *GoldScore* resulted the most negative average IE (~ -121 kCal·mol<sup>-1</sup>) and least RMSD. Thus, a strong correlation was observed between the average IE and the RMSD.

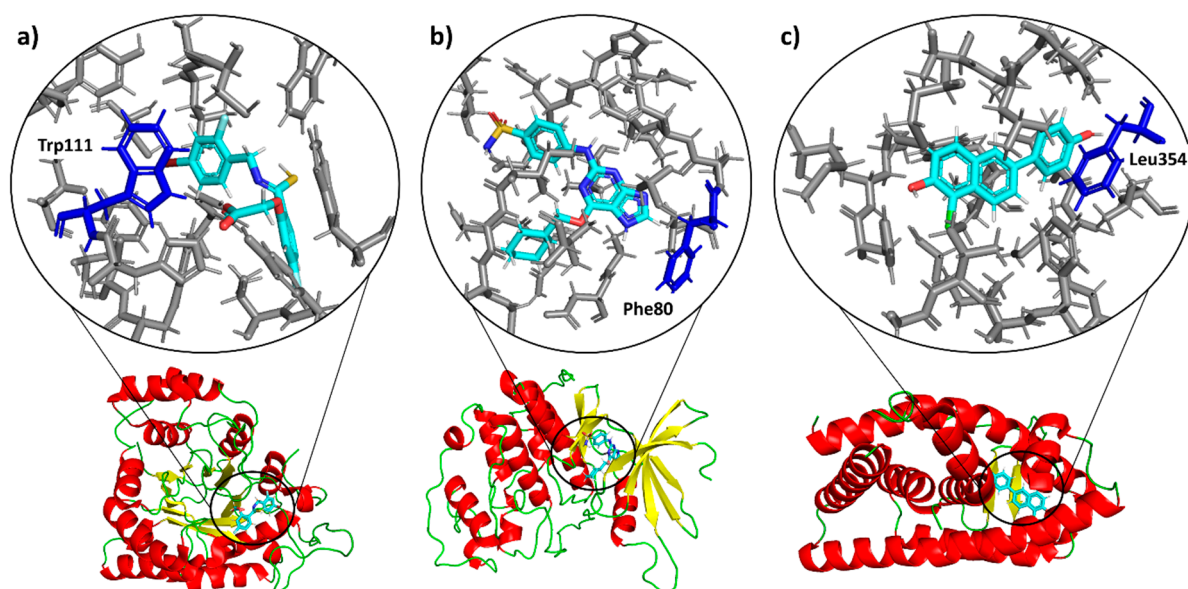

**Figure S10** Views of the active sites of (a) hAR-IDD594, (b) CDK2-NU6102 and (c) ERB-4NA highlighting the complexed ligand (cyan) and the residues chosen as the active site centre (blue).

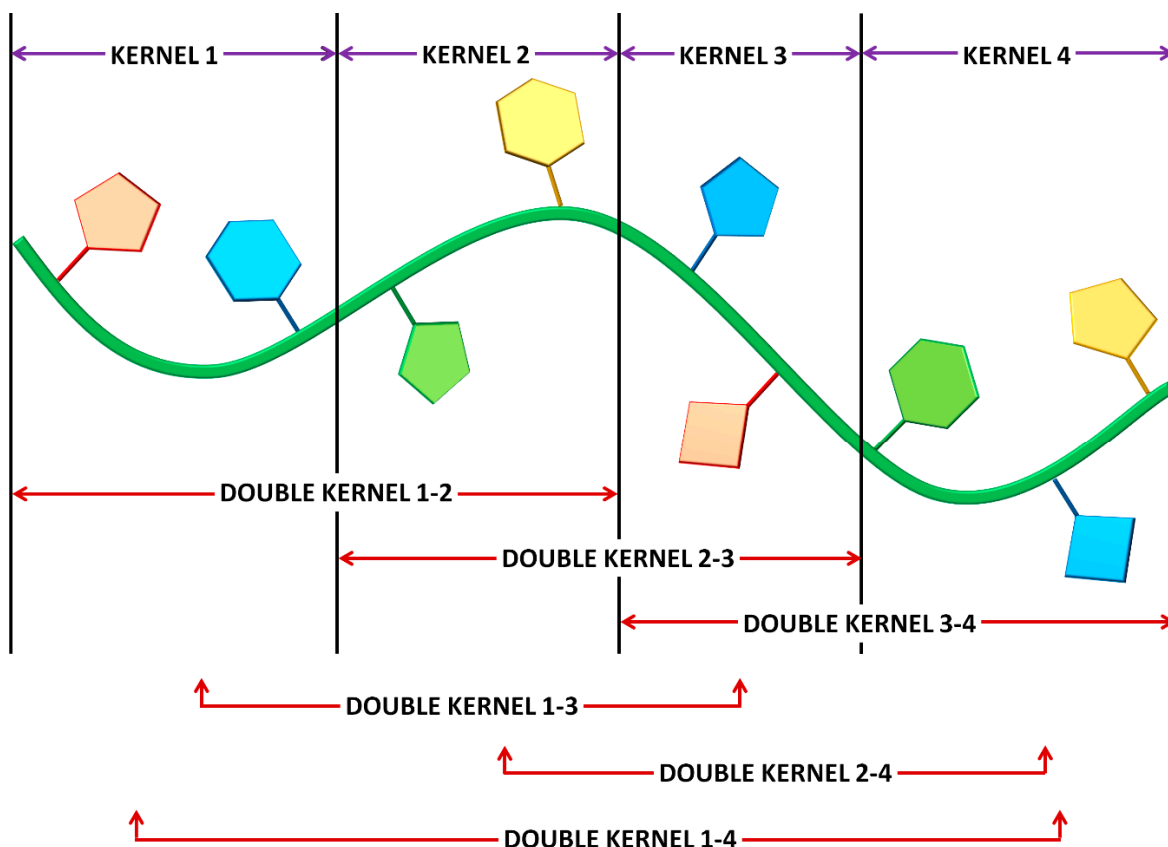

**Figure S11** Representation of the fragmentation of macromolecule as single and double kernels

## Reference

1. Ferrari, A.M.; Degliesposti, G.; Sgobba, M.; Rastelli, G. Validation of an automated procedure for the prediction of relative free energies of binding on a set of aldose reductase inhibitors. *Bioorg. Med. Chem.* **2007**, *15*, 7865–7877, doi:10.1016/j.bmc.2007.08.019.
2. Hardcastle, I.R.; Arris, C.E.; Bentley, J.; Boyle, F.T.; Chen, Y.; Curtin, N.J.; Endicott, J.A.; Gibson, A.E.; Golding, B.T.; Griffin, R.J.; et al. N<sup>2</sup>-Substituted O<sup>6</sup>-Cyclohexylmethylguanine Derivatives: Potent Inhibitors of Cyclin-Dependent Kinases 1 and 2. *J. Med. Chem.* **2004**, *47*, 3710–3722, doi:10.1021/jm0311442.
3. Mewshaw, R.E.; Edsall, R.J.; Yang, C.; Manas, E.S.; Xu, Z.B.; Henderson, R.A.; Keith, J.C.; Harris, H.A. ER $\beta$  Ligands. 3. Exploiting Two Binding Orientations of the 2-Phenyl-naphthalene Scaffold To Achieve ER $\beta$  Selectivity. *J. Med. Chem.* **2005**, *48*, 3953–3979, doi:10.1021/jm058173s.
